# Supplementary material for: Colorimetric detection of fluoride ions by anthraimidazoledione based sensors in the presence of Cu(ii) ions
Source: Royal Society of Chemistry journal article supplement (doi:10.1039/c5dt03209a), 2015-12-01
Supplement: c5dt03209a1.pdf [file c5dt03209a1.pdf]

## Electronic Supporting Information

### **Colorimetric detection of fluoride ion by anthraimidazoledione based sensor in presence of Cu<sup>2+</sup> ion**

Amrita Sarkar, Sudipta Bhattacharyya and Arindam Mukherjee\*

## Contents

|                                                                                                                                                                                                                                                                                                                                                                                                                                                                                                                                                                                                                                                                                                                                                                                                                                                                                                                                                                                                                                                        |    |
|--------------------------------------------------------------------------------------------------------------------------------------------------------------------------------------------------------------------------------------------------------------------------------------------------------------------------------------------------------------------------------------------------------------------------------------------------------------------------------------------------------------------------------------------------------------------------------------------------------------------------------------------------------------------------------------------------------------------------------------------------------------------------------------------------------------------------------------------------------------------------------------------------------------------------------------------------------------------------------------------------------------------------------------------------------|----|
| <b>Fig. S1</b> UV-vis spectra of <b>1-4</b> in acetonitrile (2% DMSO). The concentration of <b>1-4</b> is 25 $\mu\text{M}$ . .....                                                                                                                                                                                                                                                                                                                                                                                                                                                                                                                                                                                                                                                                                                                                                                                                                                                                                                                     | 6  |
| <b>Fig. S2</b> (A) Colorimetric response of <b>2</b> (25 $\mu\text{M}$ ) in presence of different anions ( $1.5 \times 10^{-4}$ M) in acetonitrile (2 % DMSO) solution. (B) UV-vis spectra of <b>2</b> (25 $\mu\text{M}$ ) in presence of different anions ( $1.5 \times 10^{-4}$ M) in acetonitrile (2 % DMSO) solution. Charge transfer band at 462 nm is observed. ....                                                                                                                                                                                                                                                                                                                                                                                                                                                                                                                                                                                                                                                                             | 7  |
| <b>Fig. S3</b> (A) Colorimetric response of <b>3</b> (25 $\mu\text{M}$ ) in presence of different anions ( $1.5 \times 10^{-4}$ M) in acetonitrile (2 % DMSO) solution. (B) UV-vis spectra of <b>3</b> (25 $\mu\text{M}$ ) in presence of different anions ( $1.5 \times 10^{-4}$ M) in acetonitrile (2 % DMSO) solution. Charge transfer band at 500 nm is observed. ....                                                                                                                                                                                                                                                                                                                                                                                                                                                                                                                                                                                                                                                                             | 8  |
| <b>Fig. S4</b> (A) UV-vis titration of <b>3</b> in acetonitrile (2% DMSO) with gradual addition of 4 $\mu\text{L}$ TBAOH ( $1 \times 10^{-3}$ M) solution in acetonitrile. The spectrum shows no red shift of CT band at 500 nm of <b>3</b> even after 50 $\mu\text{M}$ addition of TBAOH. (B) UV-vis titration of <b>3</b> in acetonitrile (2% DMSO) with gradual addition of 4 $\mu\text{L}$ TBAF ( $1 \times 10^{-3}$ M) solution in acetonitrile. The highest concentration of $\text{F}^-$ achieved was $1.5 \times 10^{-4}$ M. The spectrum shows almost no red shift of CT band at 500 nm even after the addition of addition of $1.5 \times 10^{-4}$ M TBAF. (C) UV-vis titration of <b>3</b> in acetonitrile (2% DMSO) with gradual addition of 4 $\mu\text{L}$ TBACN ( $1 \times 10^{-3}$ M) solution in acetonitrile. The highest concentration of $\text{CN}^-$ achieved was $1.5 \times 10^{-4}$ M. The spectrum shows almost no red shift of CT band at 500 nm even after the addition of addition of $1.5 \times 10^{-4}$ M TBACN. .... | 9  |
| <b>Fig. S5</b> (A) UV-vis titration of a higher concentration, $1.5 \times 10^{-4}$ M of <b>3</b> , in acetonitrile (2% DMSO) with gradual addition of TBAOH (upto $1.4 \times 10^{-3}$ M) solution in acetonitrile. The spectra shows 150 nm red shift ( $\Delta\lambda$ ) after achieving saturation with the addition of 100 equivalent of $\text{OH}^-$ . However the shifted spectra reverts back to original position after 90 min of last addition of $\text{OH}^-$ . (B) UV-vis titration of <b>3</b> with much higher concentration ( $1.5 \times 10^{-4}$ M) in acetonitrile (2% DMSO) with gradual addition of TBAF (upto $3.5 \times 10^{-2}$ M) solution in acetonitrile. The spectra shows 50 nm red shift ( $\Delta\lambda$ ) after achieving saturation with the addition of 234 equivalent of TBAF.....                                                                                                                                                                                                                               | 10 |
| <b>Fig. S6</b> $^{19}\text{F}$ NMR titration spectra (partial) of <b>1</b> ( $4.9 \times 10^{-2}$ M) in $\text{DMSO-}d_6$ with different concentration of TBAF (given equivalent compared to <b>1</b> ). .....                                                                                                                                                                                                                                                                                                                                                                                                                                                                                                                                                                                                                                                                                                                                                                                                                                         | 10 |
| <b>Fig. S7</b> Partial $^1\text{H}$ NMR spectra of <b>4</b> ( $9.9 \times 10^{-2}$ M) in $\text{DMSO-}d_6$ in presence of TBAF (0-5.5 equivalent). Inset: (A) Expansion of the region 14-17 ppm in presence of 1.5 – 5.5 equivalent TBAF. ....                                                                                                                                                                                                                                                                                                                                                                                                                                                                                                                                                                                                                                                                                                                                                                                                         | 11 |
| <b>Fig. S8</b> $^{19}\text{F}$ NMR titration spectra (partial) of <b>4</b> ( $9.9 \times 10^{-2}$ M) in $\text{DMSO-}d_6$ with different concentration of TBAF (given equivalent compared to <b>4</b> ). .....                                                                                                                                                                                                                                                                                                                                                                                                                                                                                                                                                                                                                                                                                                                                                                                                                                         | 11 |
| <b>Fig. S9</b> UV-vis titration of <b>1</b> and <b>4</b> in acetonitrile (2% DMSO) with gradual addition of 4 $\mu\text{L}$ TBAOH ( $1 \times 10^{-3}$ M) solution in acetonitrile. (A) The spectral change of <b>1</b> is displayed due to addition of TBAOH. The spectra shows 57 nm red shift ( $\Delta\lambda$ ) after achieving saturation with the addition of 0.96 equivalent of TBAOH. (B) The spectral change of <b>4</b> is displayed due to addition of TBAOH. The spectra shows 72 nm red shift ( $\Delta\lambda$ ) after achieving saturation with the addition of 0.80 equivalent of TBAOH. ....                                                                                                                                                                                                                                                                                                                                                                                                                                         | 12 |
| <b>Fig. S10</b> Partial $^1\text{H}$ NMR spectra of <b>1</b> ( $4.9 \times 10^{-2}$ M) in $\text{DMSO-}d_6$ in presence of TBACN solution ( $1.7 \times 10^{-1}$ M) in $\text{DMSO-}d_6$ (0-4.0 equivalent). .....                                                                                                                                                                                                                                                                                                                                                                                                                                                                                                                                                                                                                                                                                                                                                                                                                                     | 12 |
| <b>Fig. S11</b> Partial $^1\text{H}$ NMR spectra of <b>4</b> ( $7.9 \times 10^{-2}$ M) in $\text{DMSO-}d_6$ in presence of TBACN solution ( $1.7 \times 10^{-1}$ M) in $\text{DMSO-}d_6$ (0-4.0 equivalent). .....                                                                                                                                                                                                                                                                                                                                                                                                                                                                                                                                                                                                                                                                                                                                                                                                                                     | 13 |

|                                                                                                                                                                                                                                                                                                                                                                                                                                                                                                                                                                                                                                                                                                                                                                                                                        |    |
|------------------------------------------------------------------------------------------------------------------------------------------------------------------------------------------------------------------------------------------------------------------------------------------------------------------------------------------------------------------------------------------------------------------------------------------------------------------------------------------------------------------------------------------------------------------------------------------------------------------------------------------------------------------------------------------------------------------------------------------------------------------------------------------------------------------------|----|
| <b>Fig. S12</b> Partial $^1\text{H}$ NMR spectra of <b>3</b> (concentration of <b>3</b> is $5.4 \times 10^{-2}$ M) in $\text{DMSO-}d_6$ in presence of TBAF solution ( $6.75 \times 10^{-1}$ M) in $\text{DMSO-}d_6$ (0-2.0 equivalent). Disappearance of NH peak at 7.9 ppm indicates deprotonation of imidazole hydrogen due to addition of fluoride.....                                                                                                                                                                                                                                                                                                                                                                                                                                                            | 13 |
| <b>Fig. S13</b> Partial $^1\text{H}$ NMR spectra of <b>3</b> (concentration of <b>3</b> is $5.4 \times 10^{-2}$ M) in $\text{DMSO-}d_6$ in presence of TBAF solution ( $6.75 \times 10^{-1}$ M) in $\text{DMSO-}d_6$ (0-2.0 equivalent). Formation of triplet at 16.0 ppm suggests formation of $[\text{HF}_2]^-$ adduct due to addition of fluoride.....                                                                                                                                                                                                                                                                                                                                                                                                                                                              | 14 |
| <b>Fig. S14</b> Partial $^{19}\text{F}$ NMR spectra of <b>3</b> (concentration of <b>3</b> is $5.4 \times 10^{-2}$ M) in $\text{DMSO-}d_6$ in presence of TBAF solution ( $6.75 \times 10^{-1}$ M) in $\text{DMSO-}d_6$ (0-2.0 equivalent). Formation of doublet at -142.5 ppm suggests formation of $[\text{HF}_2]^-$ adduct due to addition of fluoride.....                                                                                                                                                                                                                                                                                                                                                                                                                                                         | 14 |
| <b>Fig. S15</b> (A) Colorimetric response of <b>4</b> (25 $\mu\text{M}$ ) in presence $\text{CuCl}_2$ (12.5 $\mu\text{M}$ ) with addition of different anions ( $1.5 \times 10^{-4}$ M) in acetonitrile (2 % DMSO) solution. (B) UV-vis spectra of <b>4</b> (25 $\mu\text{M}$ ) in presence in presence $\text{CuCl}_2$ (12.5 $\mu\text{M}$ ) with addition of different anions ( $1.5 \times 10^{-4}$ M) in acetonitrile (2 % DMSO) solution. Charge transfer band at 400 nm has been monitored. ....                                                                                                                                                                                                                                                                                                                 | 15 |
| <b>Fig. S16</b> (A) UV-vis titration of <b>4</b> in acetonitrile (2% DMSO) with gradual addition of $\text{CuCl}_2$ ( $1 \times 10^{-3}$ M) solution in acetonitrile. Concentration of <b>4</b> is 25 $\mu\text{M}$ and highest concentration of $\text{CuCl}_2$ is $1.4 \times 10^{-4}$ M. The spectra shows almost no change in CT band of <b>4</b> due to addition of $\text{Cu}^{2+}$ . (B) UV-vis titration of <b>4</b> in presence of $\text{Cu}^{2+}$ in acetonitrile (2% DMSO) with gradual addition of 4 $\mu\text{L}$ TBAOH ( $1 \times 10^{-3}$ M) solution in acetonitrile. Concentration of <b>4</b> is 25 $\mu\text{M}$ and $\text{Cu}^{2+}$ is 12.5 $\mu\text{M}$ . The spectra shows 51 nm red shift ( $\Delta\lambda$ ) after achieving saturation with the addition of 1.2 equivalent of TBAOH. .... | 16 |
| <b>Fig. S17</b> Job's plot of binding of receptor <b>4</b> (25 $\mu\text{M}$ ) with fluoride in presence of $\text{Cu}^{2+}$ (12.5 $\mu\text{M}$ ) where absorbance at 452 nm were plotted as a function of the molar ratio of <b>4</b> . ....                                                                                                                                                                                                                                                                                                                                                                                                                                                                                                                                                                         | 17 |
| <b>Fig. S18</b> (A) Colorimetric response of <b>1</b> (25 $\mu\text{M}$ ) in presence $\text{CuCl}_2$ (12.5 $\mu\text{M}$ ) with addition of different anions ( $1.5 \times 10^{-4}$ M) in acetonitrile (2 % DMSO) solution. (B) UV-vis spectra of <b>1</b> (25 $\mu\text{M}$ ) in presence of $\text{CuCl}_2$ (12.5 $\mu\text{M}$ ) with addition of different anions ( $1.5 \times 10^{-4}$ M) in acetonitrile (2 % DMSO) solution.....                                                                                                                                                                                                                                                                                                                                                                              | 18 |
| <b>Fig. S19</b> (A) UV-vis titration of <b>1</b> in acetonitrile (2% DMSO) with gradual addition of $\text{CuCl}_2$ (1.....                                                                                                                                                                                                                                                                                                                                                                                                                                                                                                                                                                                                                                                                                            | 19 |
| <b>Fig. S20</b> UV-vis titration of (A) <b>1</b> , (B) <b>2</b> , (C) <b>3</b> and (D) <b>4</b> with gradual addition of TBAOH in acetonitrile medium (2% DMSO). The concentration of receptors in each case (A) to (D) is 25 $\mu\text{M}$ . ....                                                                                                                                                                                                                                                                                                                                                                                                                                                                                                                                                                     | 20 |
| <b>Computational details</b> .....                                                                                                                                                                                                                                                                                                                                                                                                                                                                                                                                                                                                                                                                                                                                                                                     | 20 |
| <b>Fig. S21.</b> Selected FMO illustrations and their respective energies (in eV) of ground state optimised geometry of <b>1-4</b> obtained from DFT level calculation at B3LYP/6-31G(d) in acetonitrile as solvent...                                                                                                                                                                                                                                                                                                                                                                                                                                                                                                                                                                                                 | 21 |
| <b>Fig. S22</b> A correlative spectral overlay of electronic transition of <b>1</b> in presence of anions (experimentally in line plot) in acetonitrile; Theoretically calculated transition of <b>1</b> and its benzimidazole –NH deprotonated species ( <b>1<sup>-</sup></b> ) using TDDFT at level of B3LYP/6-31G(d) in same solvent. Experimental data falls into the Gaussian distribution of calculated transitions (oscillation strength) showing good correlation. ....                                                                                                                                                                                                                                                                                                                                        | 22 |
| <b>Fig. S23</b> A correlative spectral overlay of electronic transition of <b>4</b> in presence of anions (experimentally in line plot) in acetonitrile; Theoretically calculated transition of <b>4</b> and its benzimidazole –NH deprotonated species ( <b>4<sup>-</sup></b> ) using TDDFT at level of B3LYP/6-31G(d) in same solvent. Experimental data falls into the Gaussian distribution of calculated transitions (oscillation strength) showing good correlation. ....                                                                                                                                                                                                                                                                                                                                        | 22 |

|                                                                                                                                                                                                                                                                                                                                                                                                |    |
|------------------------------------------------------------------------------------------------------------------------------------------------------------------------------------------------------------------------------------------------------------------------------------------------------------------------------------------------------------------------------------------------|----|
| <b>Table S7.</b> Selected electronic transition data obtained from TDDFT calculations using B3LYP/6-31G(d) and acetonitrile as solvent.....                                                                                                                                                                                                                                                    | 23 |
| <b>Fig. S24</b> (A) UV-vis titration of <b>3</b> in acetonitrile (2% DMSO) in presence of $\text{Cu}^{2+}$ (conc. 12.5 $\mu\text{M}$ with gradual addition of TBAF (1 .....                                                                                                                                                                                                                    | 24 |
| <b>Fig. S25</b> Linear plot based on Benesi-Hildebrand equation for evaluation of binding constant of <b>1</b> with fluoride (0- 40 $\mu\text{M}$ ). Concentration of <b>1</b> is 25 $\mu\text{M}$ .....                                                                                                                                                                                       | 24 |
| <b>Fig. S26</b> A linear curve was obtained for the plot of $(A_0-A)/(A_0-A_{\text{max}})$ vs. $\log[\text{F}^-]$ . The intercept on the x-axis was considered as the detection limit. Thus the value obtained for the fluoride detection in case of <b>1</b> was found to be $3.57 \times 10^{-6}$ (M). Concentration of <b>1</b> is 25 $\mu\text{M}$ .....                                   | 25 |
| <b>Fig. S27</b> Linear plot based on Benesi-Hildebrand equation for evaluation of binding constant of <b>1</b> with cyanide (0 - 35 $\mu\text{M}$ ). Concentration of <b>1</b> is 25 $\mu\text{M}$ .....                                                                                                                                                                                       | 25 |
| <b>Fig. S28</b> A linear curve was obtained for the plot of $(A_0-A)/(A_0-A_{\text{max}})$ vs. $\log[\text{CN}^-]$ . The intercept on the x-axis was considered as the detection limit. Thus the value obtained for the cyanide detection in case of <b>1</b> was found to be $6.31 \times 10^{-6}$ (M). Concentration of <b>1</b> is 25 $\mu\text{M}$ .....                                   | 26 |
| <b>Fig. S29</b> Linear plot based on Benesi-Hildebrand equation for evaluation of binding constant of <b>4</b> with fluoride (0 - 62 $\mu\text{M}$ ). Concentration of <b>4</b> is 25 $\mu\text{M}$ .....                                                                                                                                                                                      | 26 |
| <b>Fig. S30</b> A linear curve was obtained for the plot of $(A_0-A)/(A_0-A_{\text{max}})$ vs. $\log[\text{F}^-]$ . The intercept on the x-axis was considered as the detection limit. Thus the value obtained for the fluoride detection in case of <b>4</b> was found to be $4.30 \times 10^{-6}$ (M). Concentration of <b>4</b> is 25 $\mu\text{M}$ .....                                   | 27 |
| <b>Fig. S31</b> Linear plot based on Benesi-Hildebrand equation for evaluation of binding constant of <b>4</b> with cyanide (0 - 32 $\mu\text{M}$ ). Concentration of <b>4</b> is 25 $\mu\text{M}$ .....                                                                                                                                                                                       | 27 |
| <b>Fig. S32</b> A linear curve was obtained for the plot of $(A_0-A)/(A_0-A_{\text{max}})$ vs. $\log[\text{CN}^-]$ . The intercept on the x-axis was considered as the detection limit. Thus the value obtained for the cyanide detection in case of <b>4</b> was found to be $4.72 \times 10^{-6}$ (M). Concentration of <b>4</b> is 25 $\mu\text{M}$ .....                                   | 28 |
| <b>Fig. S33</b> Linear plot based on Benesi-Hildebrand equation for evaluation of binding constant of <b>4</b> (25 $\mu\text{M}$ ) in presence of $\text{Cu}^{2+}$ (12.5 $\mu\text{M}$ ) with fluoride (0 - 26 $\mu\text{M}$ ).....                                                                                                                                                            | 28 |
| <b>Fig. S34</b> A linear curve was obtained for the plot of $(A_0-A)/(A_0-A_{\text{max}})$ vs. $\log[\text{F}^-]$ . The intercept on the x-axis was considered as the detection limit. Thus the value obtained for the fluoride detection in case of <b>4</b> was found to be $2.03 \times 10^{-6}$ (M). Concentration of <b>4</b> is 25 $\mu\text{M}$ .....                                   | 29 |
| <b>Fig. S35</b> Linear plot based on Benesi-Hildebrand equation for evaluation of binding constant of <b>4</b> (25 $\mu\text{M}$ ) in presence of $\text{Cu}^{2+}$ (12.5 $\mu\text{M}$ ) with cyanide (0 - 60 $\mu\text{M}$ ).....                                                                                                                                                             | 29 |
| <b>Fig. S36</b> A linear curve was obtained for the plot of $(A_0-A)/(A_0-A_{\text{max}})$ vs. $\log[\text{CN}^-]$ . The intercept on the x-axis was considered as the detection limit. Thus the value obtained for the cyanide detection in case of <b>4</b> in presence of $\text{Cu}^{2+}$ was found to be $9.12 \times 10^{-6}$ (M). Concentration of <b>4</b> is 25 $\mu\text{M}$ . ..... | 30 |
| <b>Fig. S37</b> $^1\text{H}$ NMR of <b>1</b> in $\text{DMSO}-d_6$ . .....                                                                                                                                                                                                                                                                                                                      | 30 |
| <b>Fig. S38</b> $^{13}\text{C}$ NMR of <b>1</b> in $\text{DMSO}-d_6$ . .....                                                                                                                                                                                                                                                                                                                   | 31 |
| <b>Fig. S39</b> $^1\text{H}$ NMR of <b>2</b> in $\text{DMSO}-d_6$ . .....                                                                                                                                                                                                                                                                                                                      | 31 |
| <b>Fig. S40</b> $^{13}\text{C}$ NMR of <b>2</b> in $\text{DMSO}-d_6$ . .....                                                                                                                                                                                                                                                                                                                   | 32 |
| <b>Fig. S41</b> $^1\text{H}$ NMR of <b>3</b> in $\text{DMSO}-d_6$ . .....                                                                                                                                                                                                                                                                                                                      | 32 |

|                                                                            |    |
|----------------------------------------------------------------------------|----|
| <b>Fig. S42</b> $^{13}\text{C}$ NMR of <b>3</b> in $\text{DMSO-}d_6$ ..... | 33 |
| <b>Fig. S43</b> $^1\text{H}$ NMR of <b>4</b> in $\text{DMSO-}d_6$ .....    | 33 |
| <b>Fig. S44</b> $^{13}\text{C}$ NMR of <b>4</b> in $\text{DMSO-}d_6$ ..... | 34 |
| <b>References</b> .....                                                    | 35 |

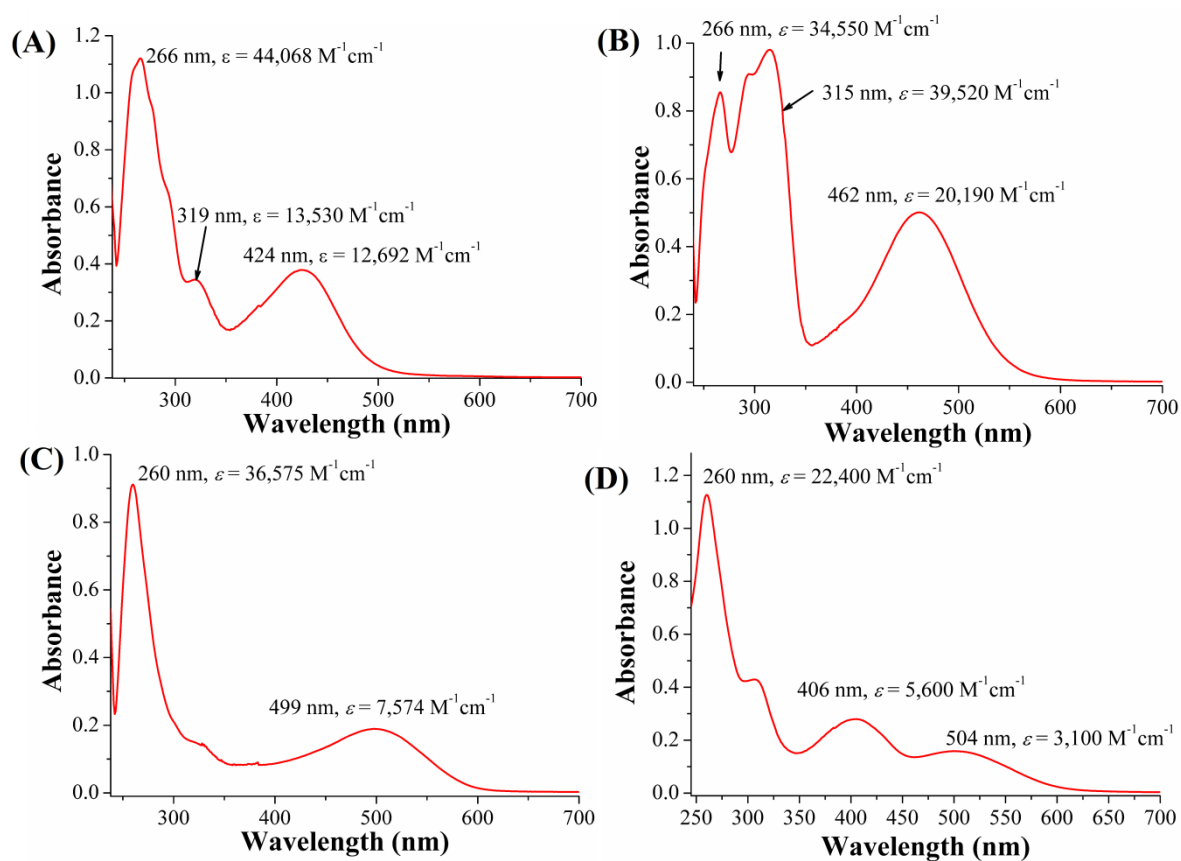

**Fig. S1** UV-vis spectra of 1-4 in acetonitrile (2% DMSO). The concentration of 1-4 is 25  $\mu\text{M}$ .

(A)

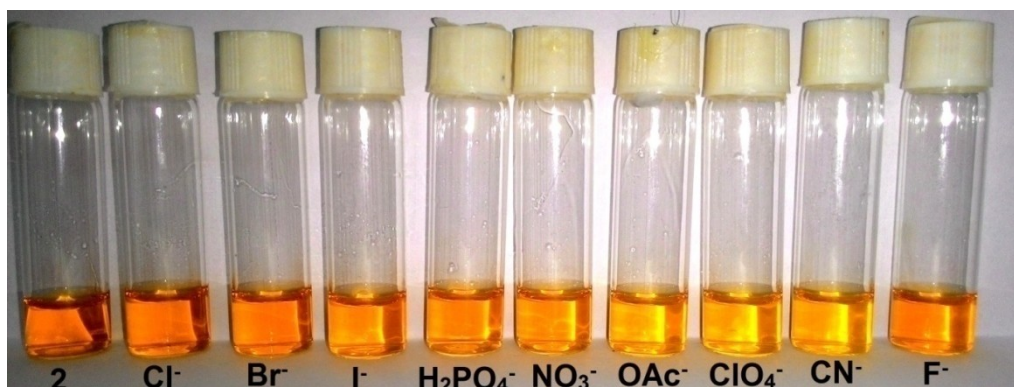

(B)

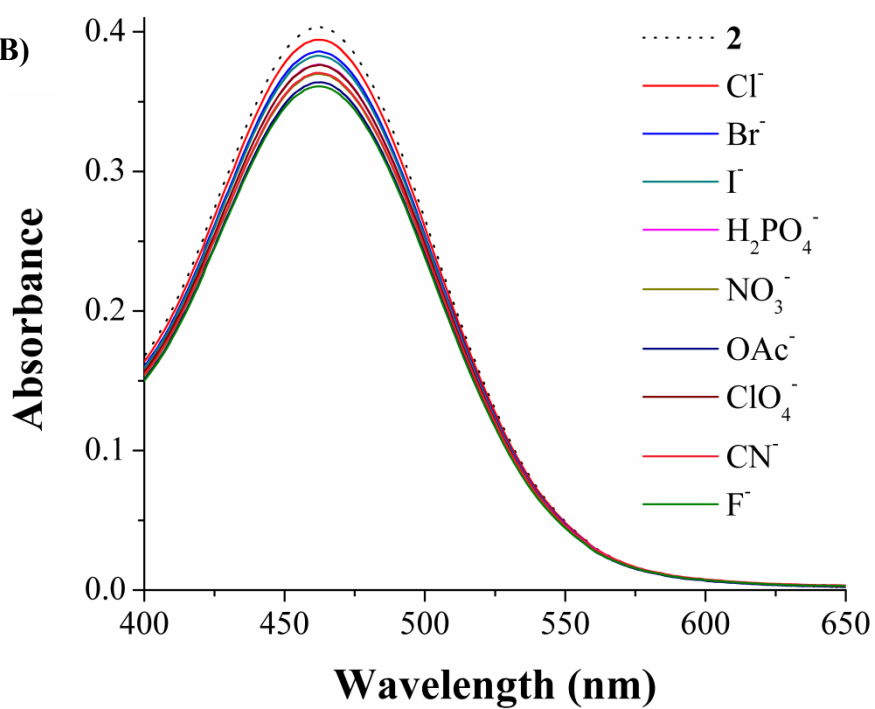

**Fig. S2** (A) Colorimetric response of **2** (25 μM) in presence of different anions (1.5 × 10<sup>-4</sup> M) in acetonitrile (2 % DMSO) solution. (B) UV-vis spectra of **2** (25 μM) in presence of different anions (1.5 × 10<sup>-4</sup> M) in acetonitrile (2 % DMSO) solution. Charge transfer band at 462 nm is observed.

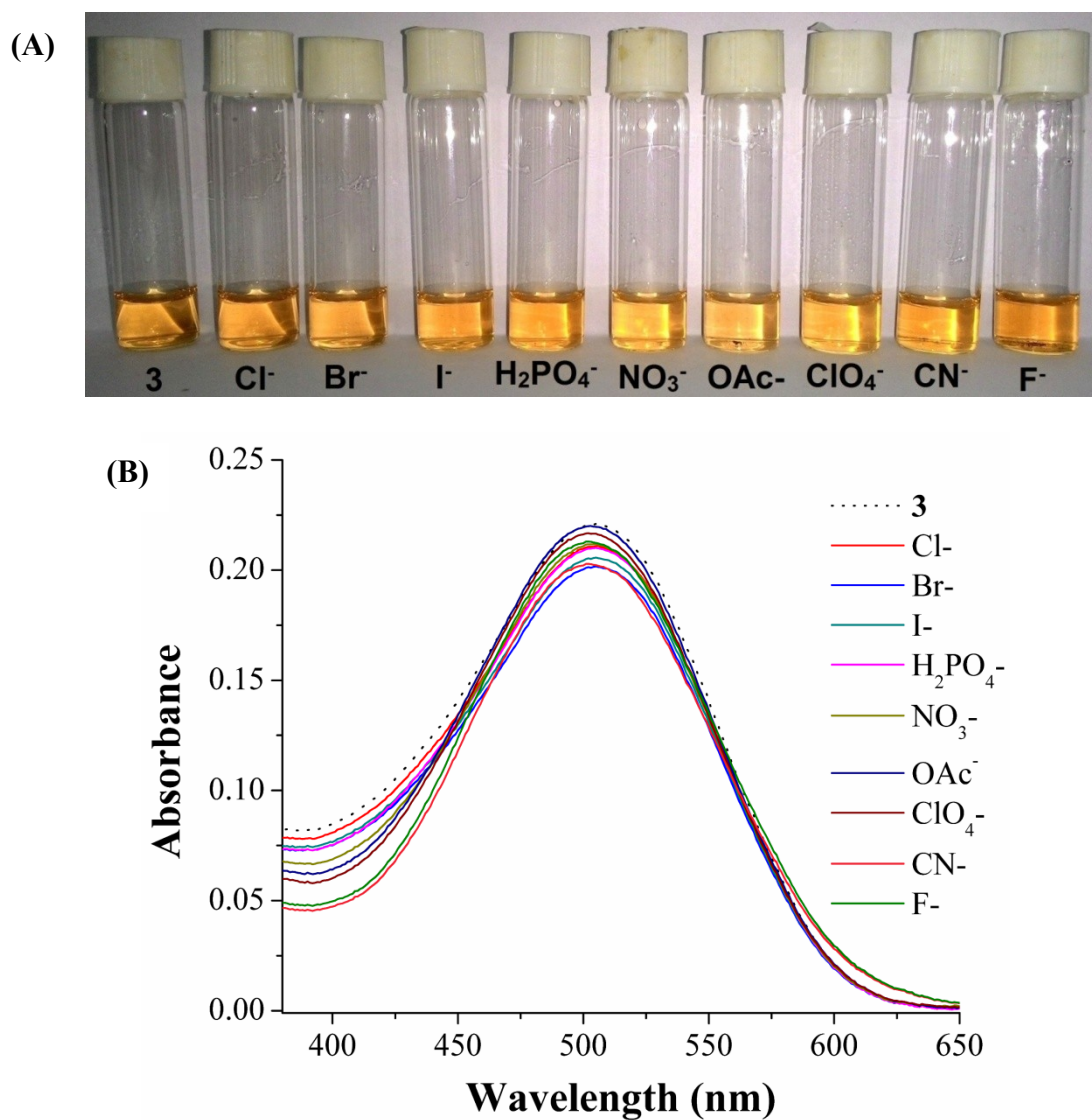

**Fig. S3** (A) Colorimetric response of **3** (25  $\mu$ M) in presence of different anions ( $1.5 \times 10^{-4}$  M) in acetonitrile (2 % DMSO) solution. (B) UV-vis spectra of **3** (25  $\mu$ M) in presence of different anions ( $1.5 \times 10^{-4}$  M) in acetonitrile (2 % DMSO) solution. Charge transfer band at 500 nm is observed.



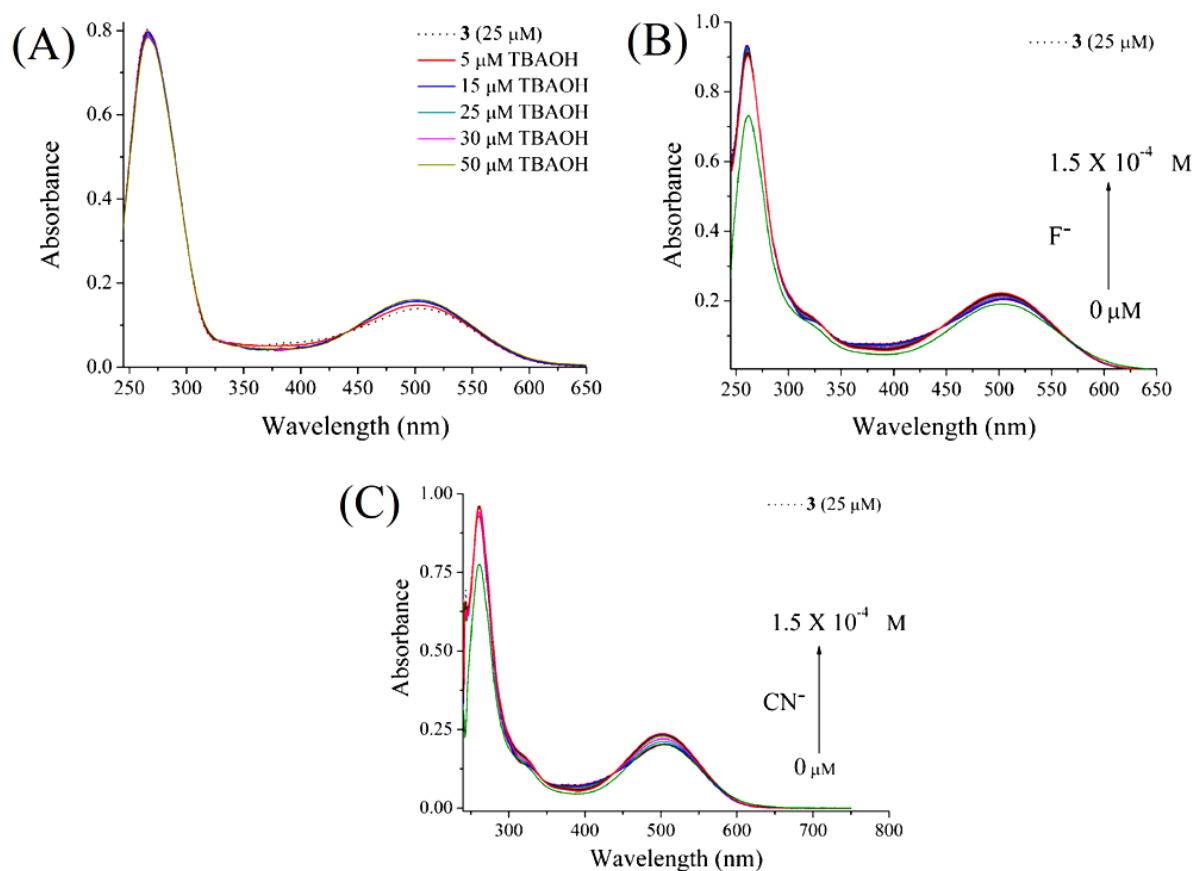

**Fig. S4** (A) UV-vis titration of **3** in acetonitrile (2% DMSO) with gradual addition of 4 μL TBAOH ( $1 \times 10^{-3}$  M) solution in acetonitrile. The spectrum shows no red shift of CT band at 500 nm of **3** even after 50 μM addition of TBAOH. (B) UV-vis titration of **3** in acetonitrile (2% DMSO) with gradual addition of 4 μL TBAF ( $1 \times 10^{-3}$  M) solution in acetonitrile. The highest concentration of F<sup>-</sup> achieved was  $1.5 \times 10^{-4}$  M. The spectrum shows almost no red shift of CT band at 500 nm even after the addition of addition of  $1.5 \times 10^{-4}$  M TBAF. (C) UV-vis titration of **3** in acetonitrile (2% DMSO) with gradual addition of 4 μL TBACN ( $1 \times 10^{-3}$  M) solution in acetonitrile. The highest concentration of CN<sup>-</sup> achieved was  $1.5 \times 10^{-4}$  M. The spectrum shows almost no red shift of CT band at 500 nm even after the addition of addition of  $1.5 \times 10^{-4}$  M TBACN.

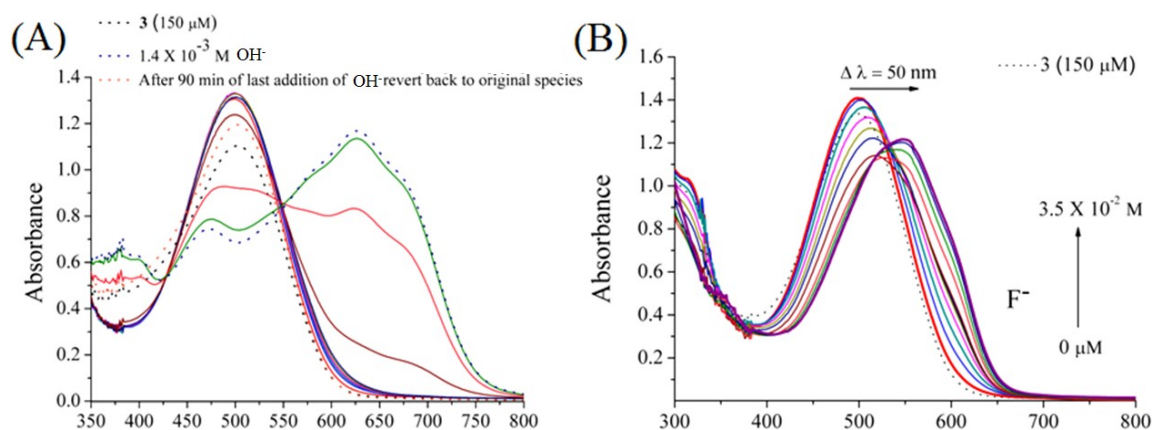

**Fig. S5** (A) UV-vis titration of a higher concentration,  $1.5 \times 10^{-4}$  M of **3**, in acetonitrile (2% DMSO) with gradual addition of TBAOH (upto  $1.4 \times 10^{-3}$  M) solution in acetonitrile. The spectra shows 150 nm red shift ( $\Delta\lambda$ ) after achieving saturation with the addition of 100 equivalent of OH<sup>-</sup>. However the shifted spectra reverts back to original position after 90 min of last addition of OH<sup>-</sup>. (B) UV-vis titration of **3** with much higher concentration ( $1.5 \times 10^{-4}$  M) in acetonitrile (2% DMSO) with gradual addition of TBAF (upto  $3.5 \times 10^{-2}$  M) solution in acetonitrile. The spectra shows 50 nm red shift ( $\Delta\lambda$ ) after achieving saturation with the addition of 234 equivalent of TBAF.

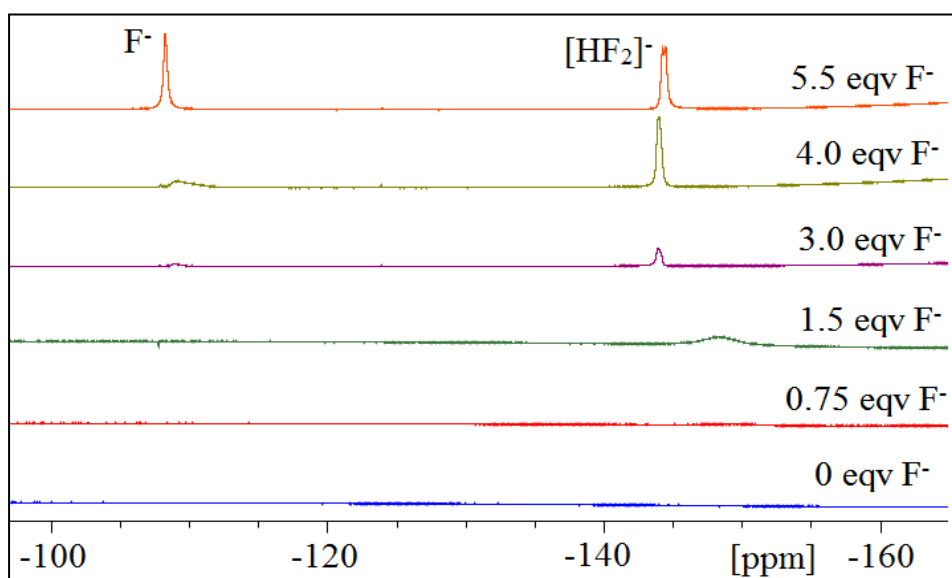

**Fig. S6** <sup>19</sup>F NMR titration spectra (partial) of **1** ( $4.9 \times 10^{-2}$  M) in DMSO-*d*<sub>6</sub> with different concentration of TBAF (given equivalent compared to **1**).

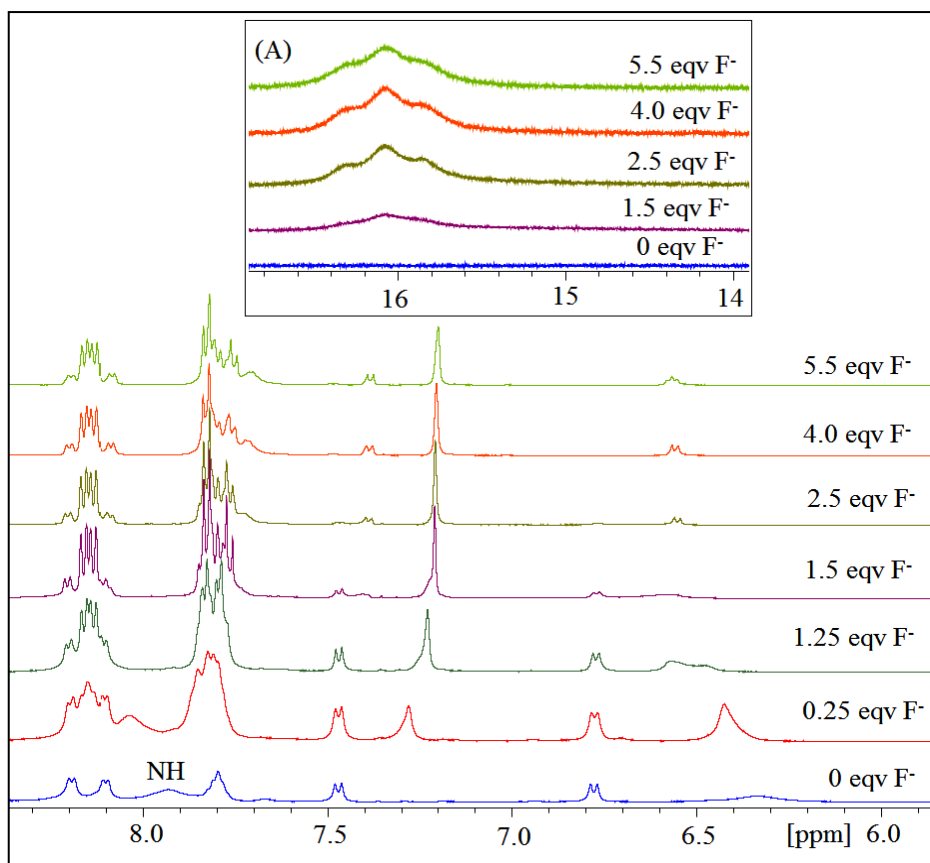

**Fig. S7** Partial  $^1\text{H}$  NMR spectra of **4** ( $9.9 \times 10^{-2}$  M) in  $\text{DMSO-}d_6$  in presence of TBAF (0-5.5 equivalent). Inset: (A) Expansion of the region 14-17 ppm in presence of 1.5 – 5.5 equivalent TBAF.

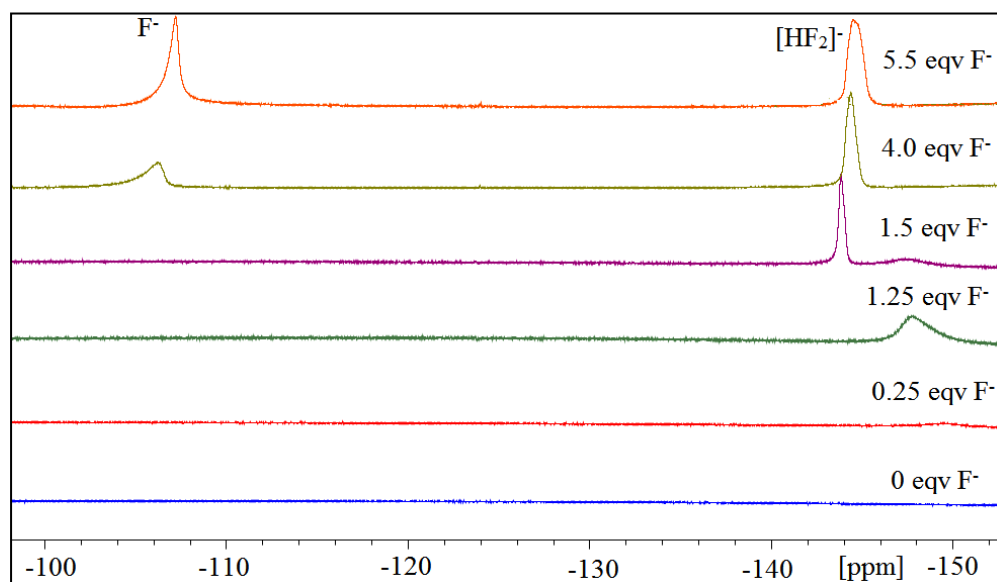

**Fig. S8**  $^{19}\text{F}$  NMR titration spectra (partial) of **4** ( $9.9 \times 10^{-2}$  M) in  $\text{DMSO-}d_6$  with different concentration of TBAF (given equivalent compared to **4**).

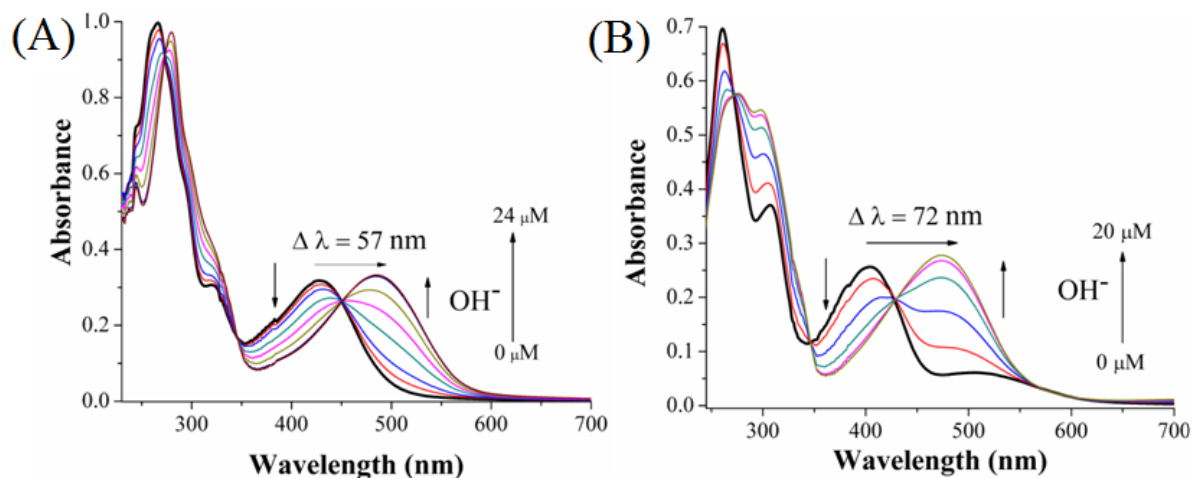

**Fig. S9** UV-vis titration of **1** and **4** in acetonitrile (2% DMSO) with gradual addition of 4  $\mu\text{L}$  TBAOH ( $1 \times 10^{-3}$  M) solution in acetonitrile. (A) The spectral change of **1** is displayed due to addition of TBAOH. The spectra shows 57 nm red shift ( $\Delta\lambda$ ) after achieving saturation with the addition of 0.96 equivalent of TBAOH. (B) The spectral change of **4** is displayed due to addition of TBAOH. The spectra shows 72 nm red shift ( $\Delta\lambda$ ) after achieving saturation with the addition of 0.80 equivalent of TBAOH.

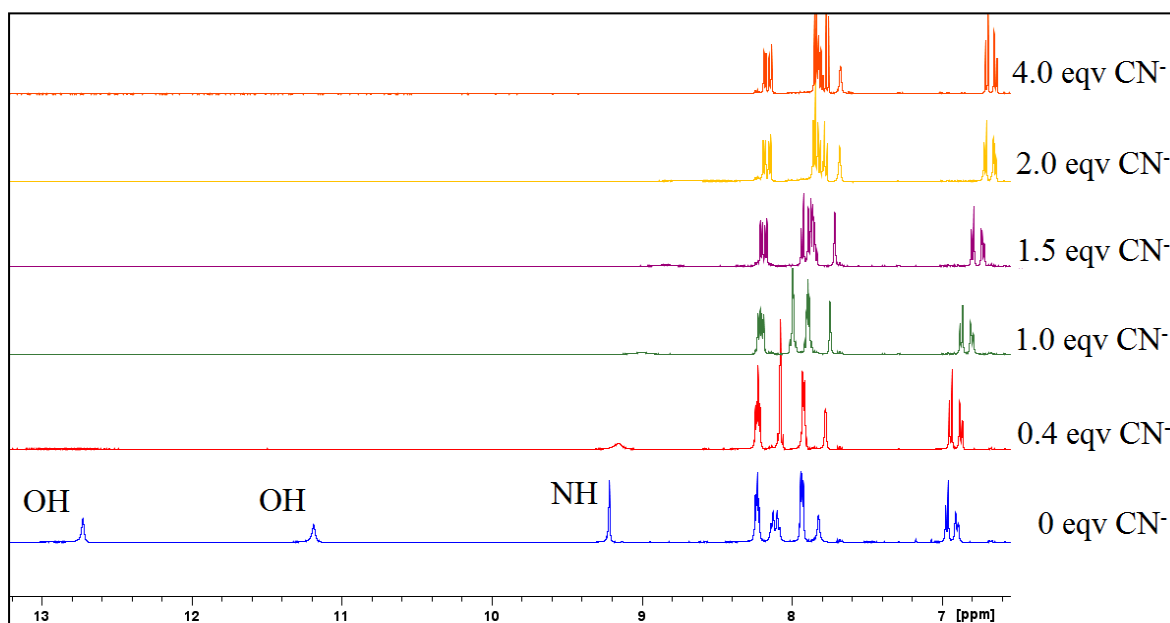

**Fig. S10** Partial  $^1\text{H}$  NMR spectra of **1** ( $4.9 \times 10^{-2}$  M) in  $\text{DMSO-}d_6$  in presence of TBAOH solution ( $1.7 \times 10^{-1}$  M) in  $\text{DMSO-}d_6$  (0-4.0 equivalent).

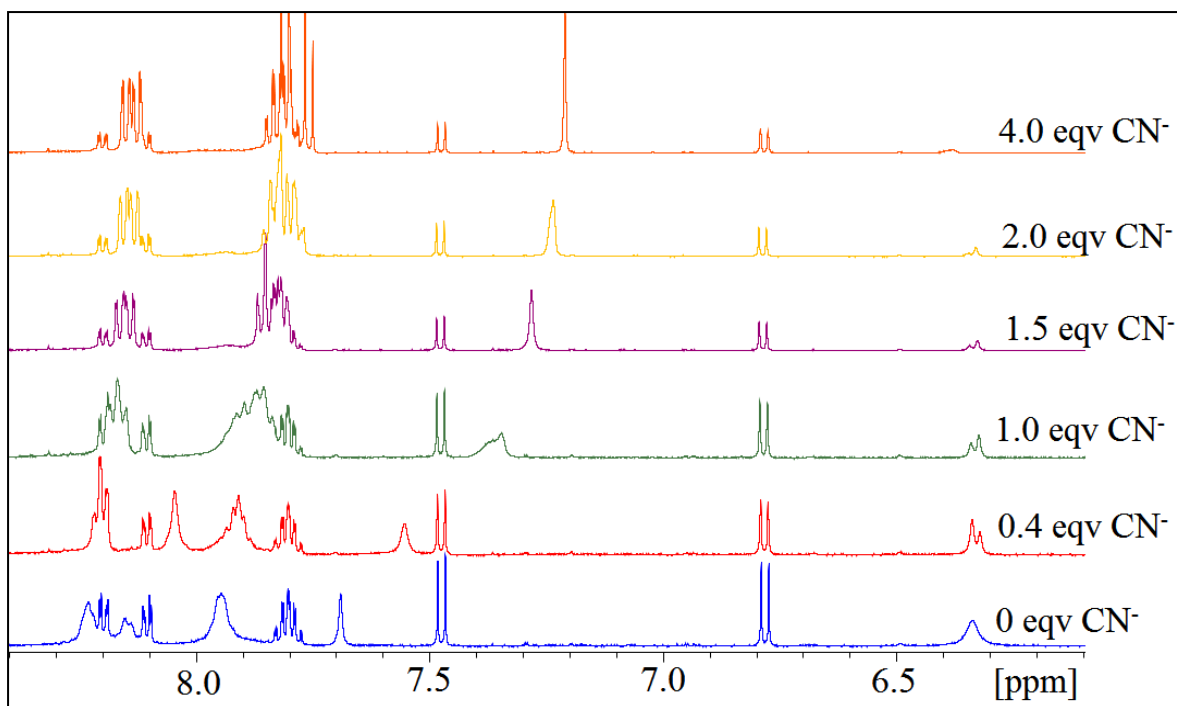

**Fig. S11** Partial  $^1\text{H}$  NMR spectra of **4** ( $7.9 \times 10^{-2}$  M) in  $\text{DMSO-}d_6$  in presence of TBACN solution ( $1.7 \times 10^{-1}$  M) in  $\text{DMSO-}d_6$  (0-4.0 equivalent).

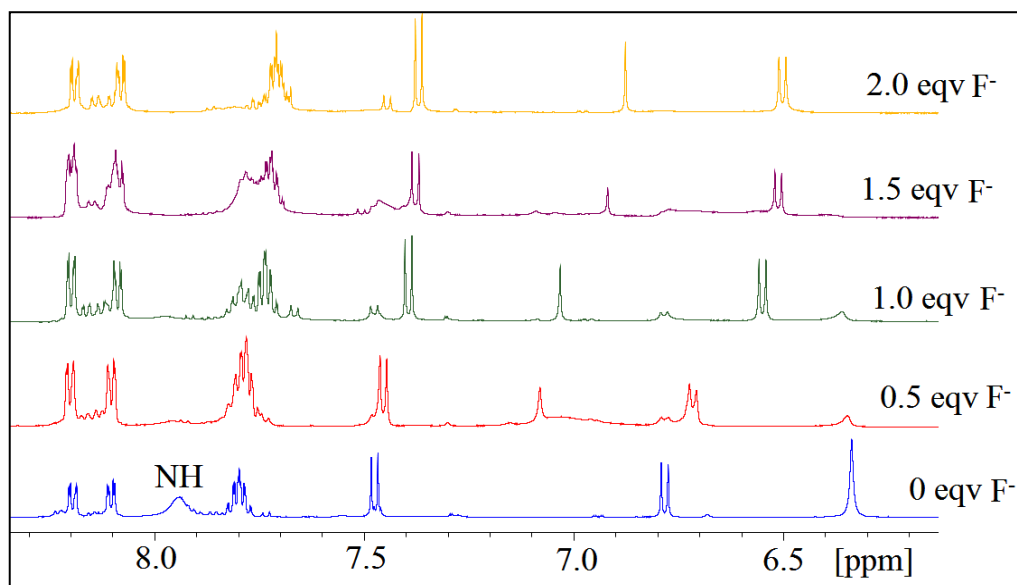

**Fig. S12** Partial  $^1\text{H}$  NMR spectra of **3** (concentration of **3** is  $5.4 \times 10^{-2}$  M) in  $\text{DMSO-}d_6$  in presence of TBAF solution ( $6.75 \times 10^{-1}$  M) in  $\text{DMSO-}d_6$  (0-2.0 equivalent). Disappearance of NH peak at 7.9 ppm indicates deprotonation of imidazole hydrogen due to addition of fluoride.

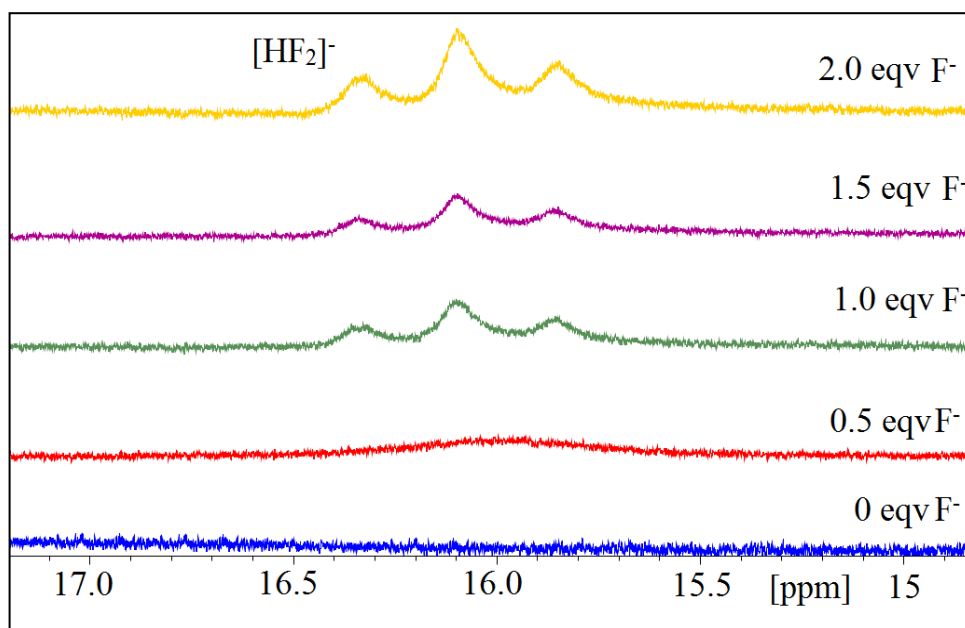

**Fig. S13** Partial  $^1\text{H}$  NMR spectra of **3** (concentration of **3** is  $5.4 \times 10^{-2}$  M) in  $\text{DMSO-}d_6$  in presence of TBAF solution ( $6.75 \times 10^{-1}$  M) in  $\text{DMSO-}d_6$  (0-2.0 equivalent). Formation of triplet at 16.0 ppm suggests formation of  $[\text{HF}_2]^-$  adduct due to addition of fluoride.

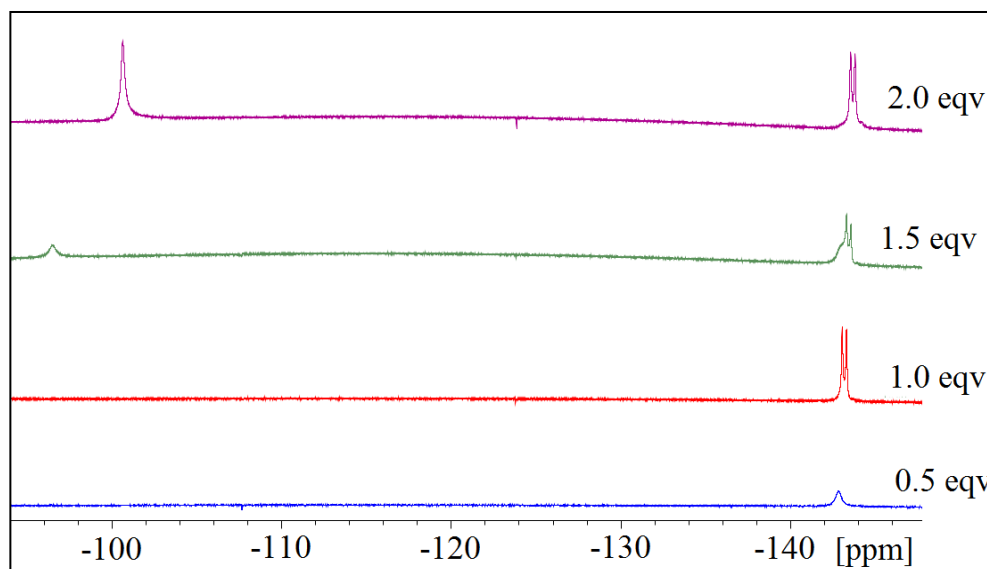

**Fig. S14** Partial  $^{19}\text{F}$  NMR spectra of **3** (concentration of **3** is  $5.4 \times 10^{-2}$  M) in  $\text{DMSO-}d_6$  in presence of TBAF solution ( $6.75 \times 10^{-1}$  M) in  $\text{DMSO-}d_6$  (0-2.0 equivalent). Formation of doublet at -142.5 ppm suggests formation of  $[\text{HF}_2]^-$  adduct due to addition of fluoride.

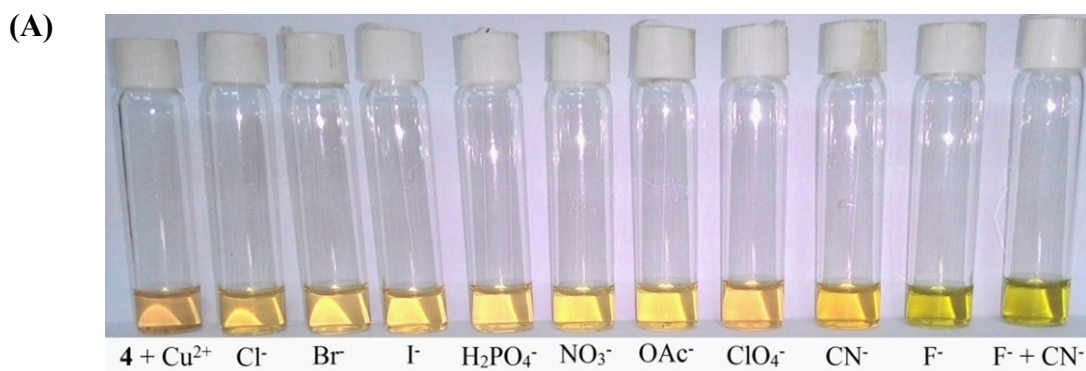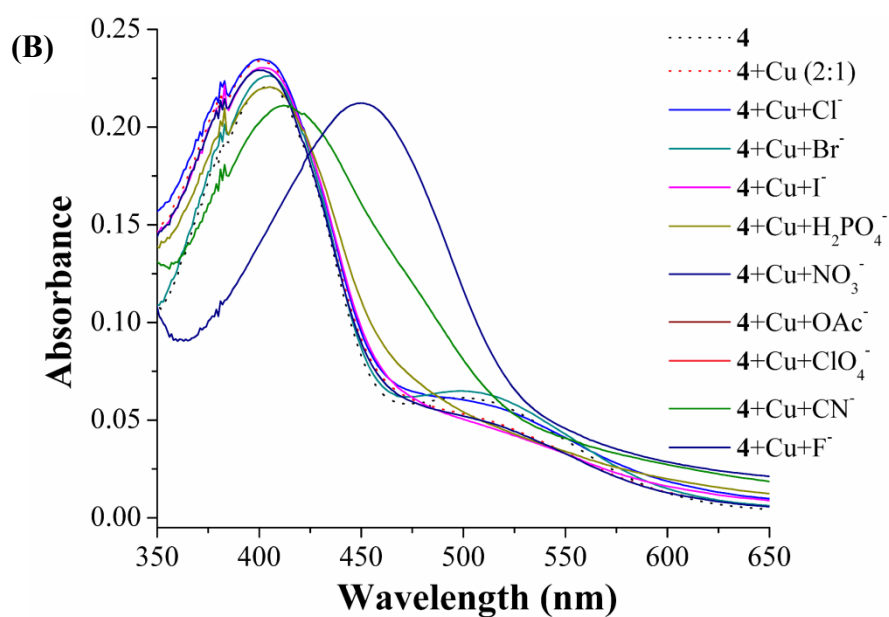

**Fig. S15** (A) Colorimetric response of **4** (25  $\mu\text{M}$ ) in presence  $\text{CuCl}_2$  (12.5  $\mu\text{M}$ ) with addition of different anions ( $1.5 \times 10^{-4}$  M) in acetonitrile (2 % DMSO) solution. (B) UV-vis spectra of **4** (25  $\mu\text{M}$ ) in presence in presence  $\text{CuCl}_2$  (12.5  $\mu\text{M}$ ) with addition of different anions ( $1.5 \times 10^{-4}$  M) in acetonitrile (2 % DMSO) solution. Charge transfer band at 400 nm has been monitored.

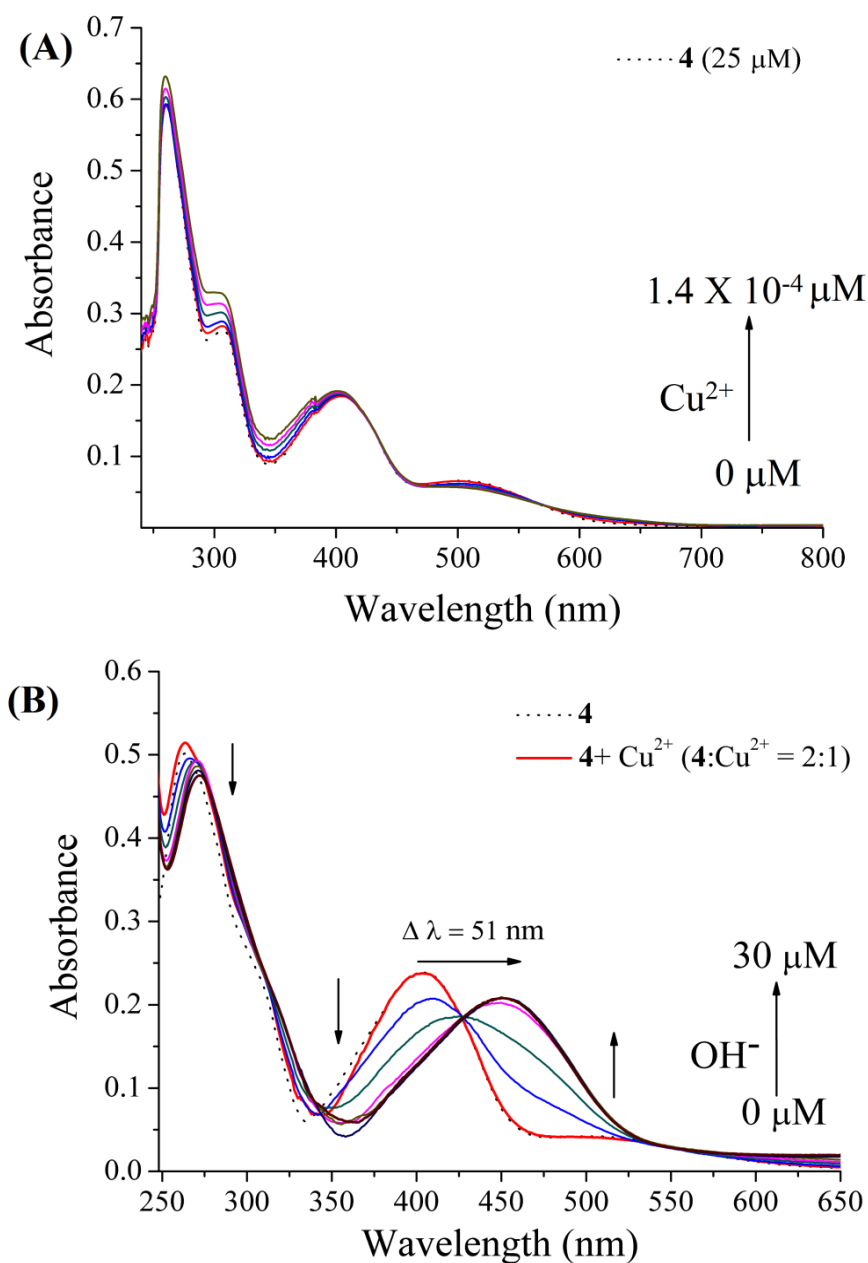

**Fig. S16** (A) UV-vis titration of **4** in acetonitrile (2% DMSO) with gradual addition of  $\text{CuCl}_2$  ( $1 \times 10^{-3} \text{ M}$ ) solution in acetonitrile. Concentration of **4** is  $25 \mu\text{M}$  and highest concentration of  $\text{CuCl}_2$  is  $1.4 \times 10^{-4} \text{ M}$ . The spectra shows almost no change in CT band of **4** due to addition of  $\text{Cu}^{2+}$ . (B) UV-vis titration of **4** in presence of  $\text{Cu}^{2+}$  in acetonitrile (2% DMSO) with gradual addition of  $4 \mu\text{L}$  TBAOH ( $1 \times 10^{-3} \text{ M}$ ) solution in acetonitrile. Concentration of **4** is  $25 \mu\text{M}$  and  $\text{Cu}^{2+}$  is  $12.5 \mu\text{M}$ . The spectra shows 51 nm red shift ( $\Delta\lambda$ ) after achieving saturation with the addition of 1.2 equivalent of TBAOH.



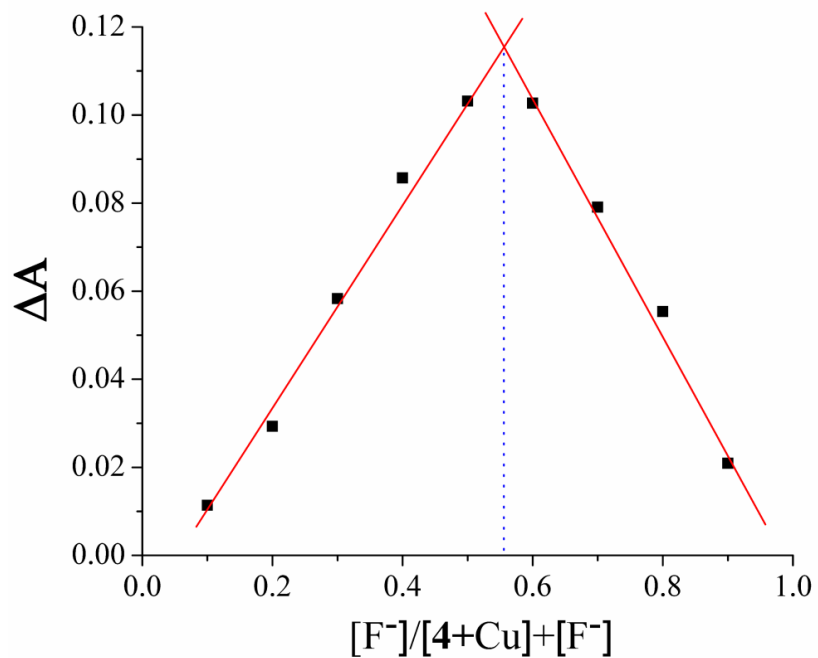

**Fig. S17** Job's plot of binding of receptor **4** (25  $\mu\text{M}$ ) with fluoride in presence of  $\text{Cu}^{2+}$  (12.5  $\mu\text{M}$ ) where absorbance at 452 nm were plotted as a function of the molar ratio of **4**.

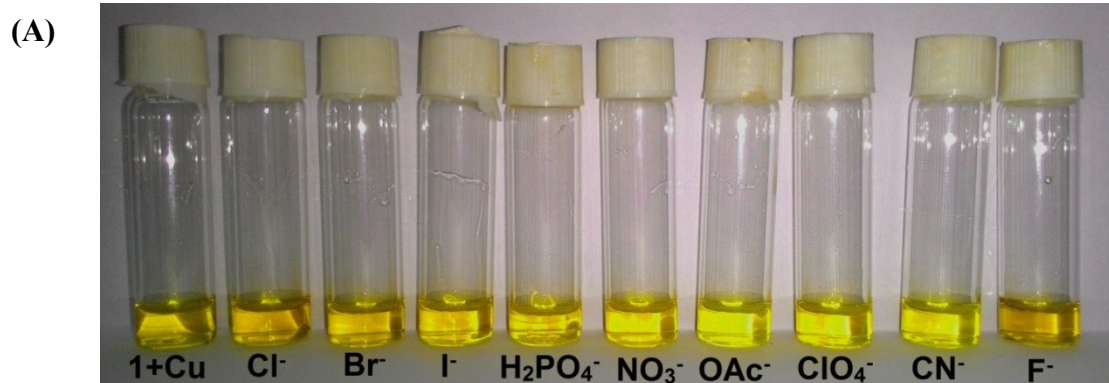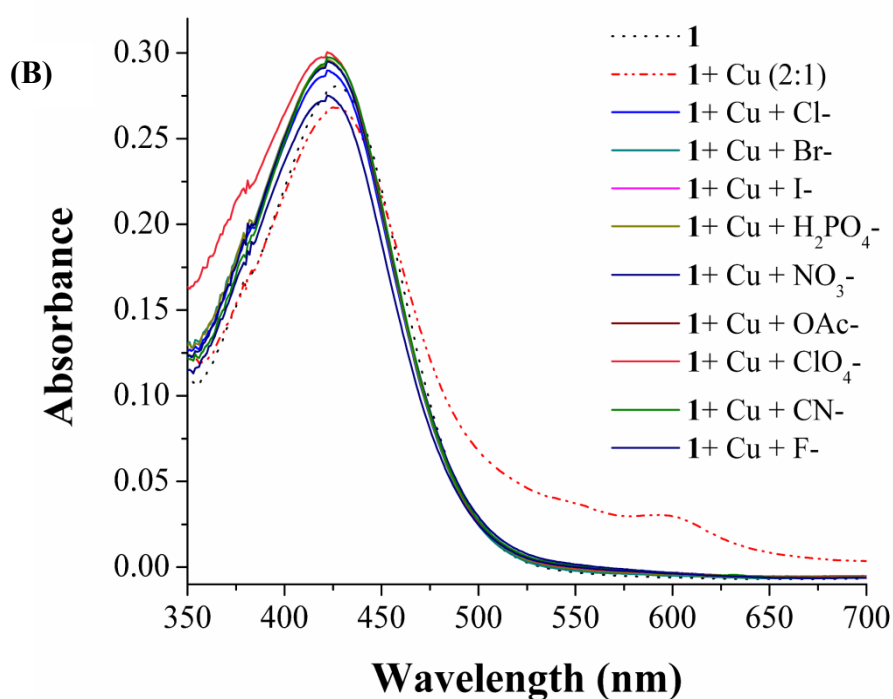

**Fig. S18** (A) Colorimetric response of **1** (25  $\mu\text{M}$ ) in presence  $\text{CuCl}_2$  (12.5  $\mu\text{M}$ ) with addition of different anions ( $1.5 \times 10^{-4}$  M) in acetonitrile (2 % DMSO) solution. (B) UV-vis spectra of **1** (25  $\mu\text{M}$ ) in presence of  $\text{CuCl}_2$  (12.5  $\mu\text{M}$ ) with addition of different anions ( $1.5 \times 10^{-4}$  M) in acetonitrile (2 % DMSO) solution.

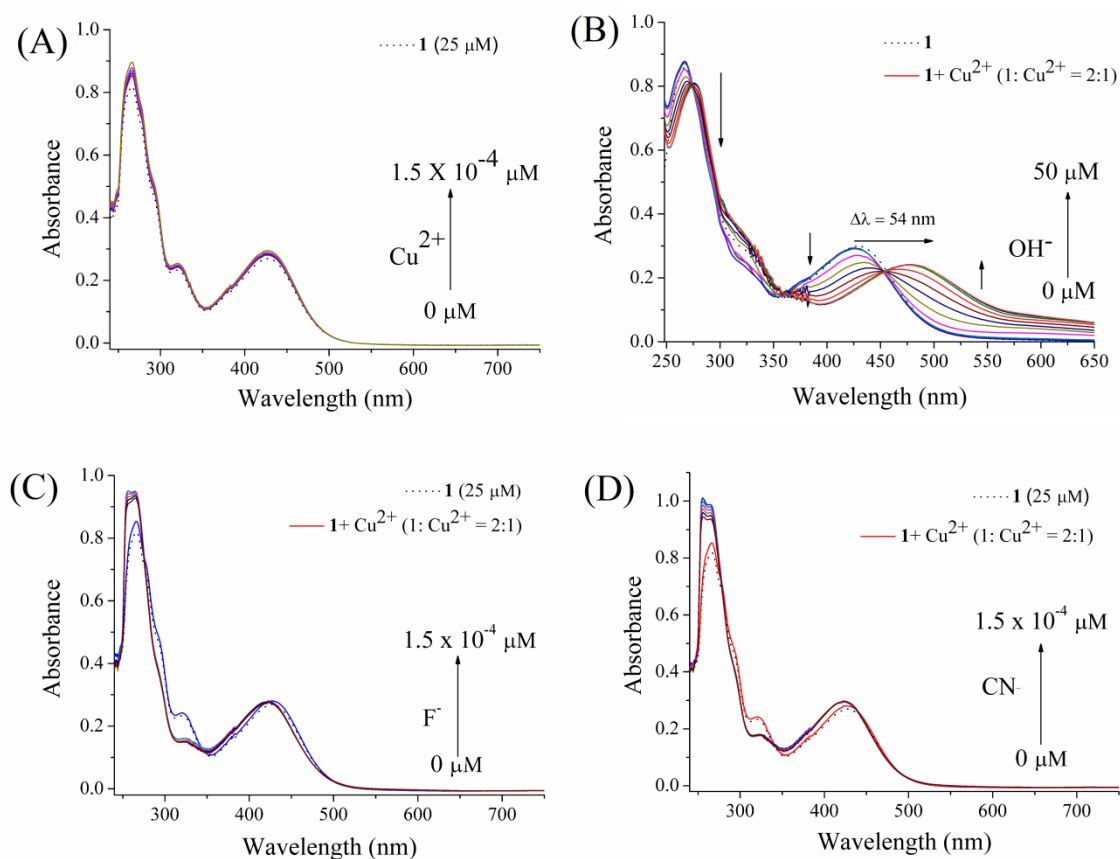

**Fig. S19** (A) UV-vis titration of **1** in acetonitrile (2% DMSO) with gradual addition of  $\text{CuCl}_2$  ( $1 \times 10^{-3}$  M) solution in acetonitrile. Highest concentration of  $\text{CuCl}_2$  is  $1 \times 10^{-3}$  M. The spectra shows no change in CT band of **1** due to addition of  $\text{Cu}^{2+}$  (B) UV-vis titration of **1** in presence of  $\text{Cu}^{2+}$  in acetonitrile (2% DMSO) with gradual addition of 4  $\mu\text{L}$  TBAOH ( $1 \times 10^{-3}$  M) solution in acetonitrile. Concentration of **1** is  $25 \mu\text{M}$  and  $\text{Cu}^{2+}$  is  $12.5 \mu\text{M}$ . The spectra shows 54 nm red shift ( $\Delta\lambda$ ) after achieving saturation with the addition of 2 equivalent of TBAOH. (C) UV-vis titration of **1** in acetonitrile (2% DMSO) in presence of  $\text{Cu}^{2+}$  (conc.  $12.5 \mu\text{M}$ ) with gradual addition of TBAF ( $1 \times 10^{-3}$  M) solution in acetonitrile. Highest concentration of  $\text{F}^-$  achieved is  $1.5 \times 10^{-4}$  M. The spectra showed almost no change in CT band of **1** due to addition of TBAF (D) UV-vis titration of **1** in acetonitrile (2% DMSO) in presence of  $\text{Cu}^{2+}$  (conc.  $12.5 \mu\text{M}$ ) with gradual addition of TBACN ( $1 \times 10^{-3}$  M) solution in acetonitrile. Highest concentration of  $\text{F}^-$  achieved is  $1.5 \times 10^{-4}$  M. The spectra showed almost no change in CT band of **1** due to addition of TBACN. The concentration of **1** in each case (A) to (D) is  $25 \mu\text{M}$ .

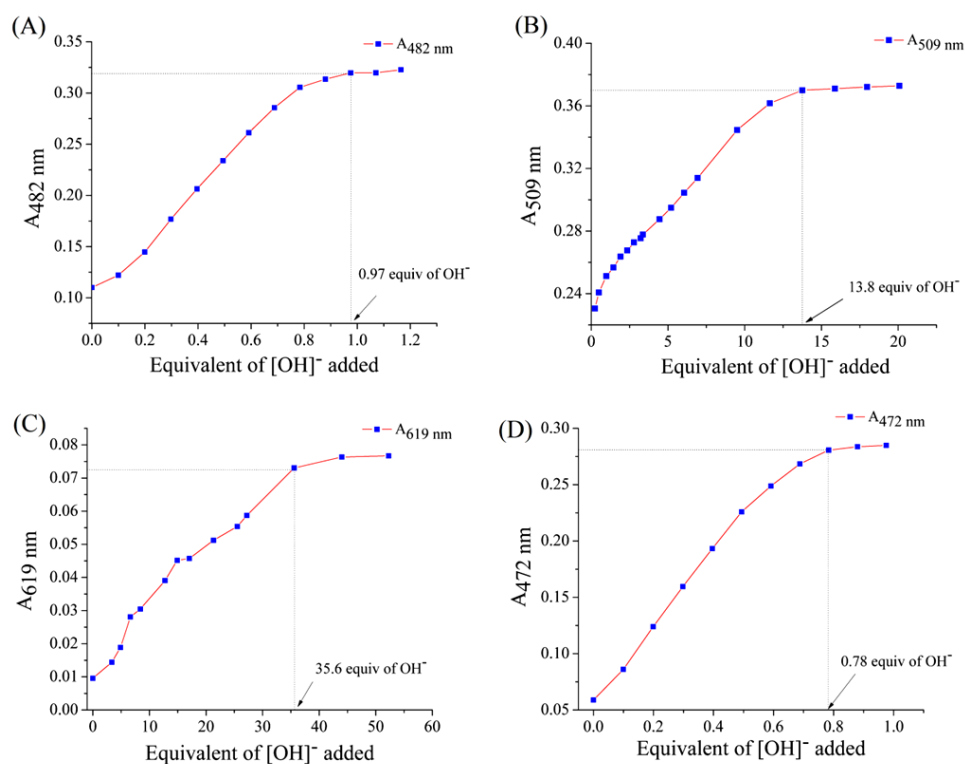

**Fig. S20** UV-vis titration of (A) **1**, (B) **2**, (C) **3** and (D) **4** with gradual addition of TBAOH in acetonitrile medium (2% DMSO). The concentration of receptors in each case (A) to (D) is 25  $\mu$ M.

### Computational details

Theoretical calculations were done using Gaussian09 software package.<sup>1</sup> Optimisation of molecular structure has been performed at the DFT level of theory with B3LYP (Becke's three-parameter hybrid model using the Lee–Yang–Parr correlation functional) function<sup>2, 3</sup> and 6-31G(d) basis set. Ground state energies and oscillator strengths were computed based on B3LYP/6-31G(d) optimised geometries using TDDFT formalism in acetonitrile. The conductor-like polarizable continuum model (CPCM)<sup>4, 5</sup> was used with the acetonitrile as solvent in both optimisation and transition energy calculation. Electronic transitions, molecular orbital energies, electronic and related orbital contributions were extracted from output files using GaussSum 2.2 GUI application.<sup>6</sup> To assign the CT band shift with **1** and **4** we have used B3LYP function and 6-31G(d) basis set on the anion (deprotonating the benzimidazole moiety) of **1** and **4**.

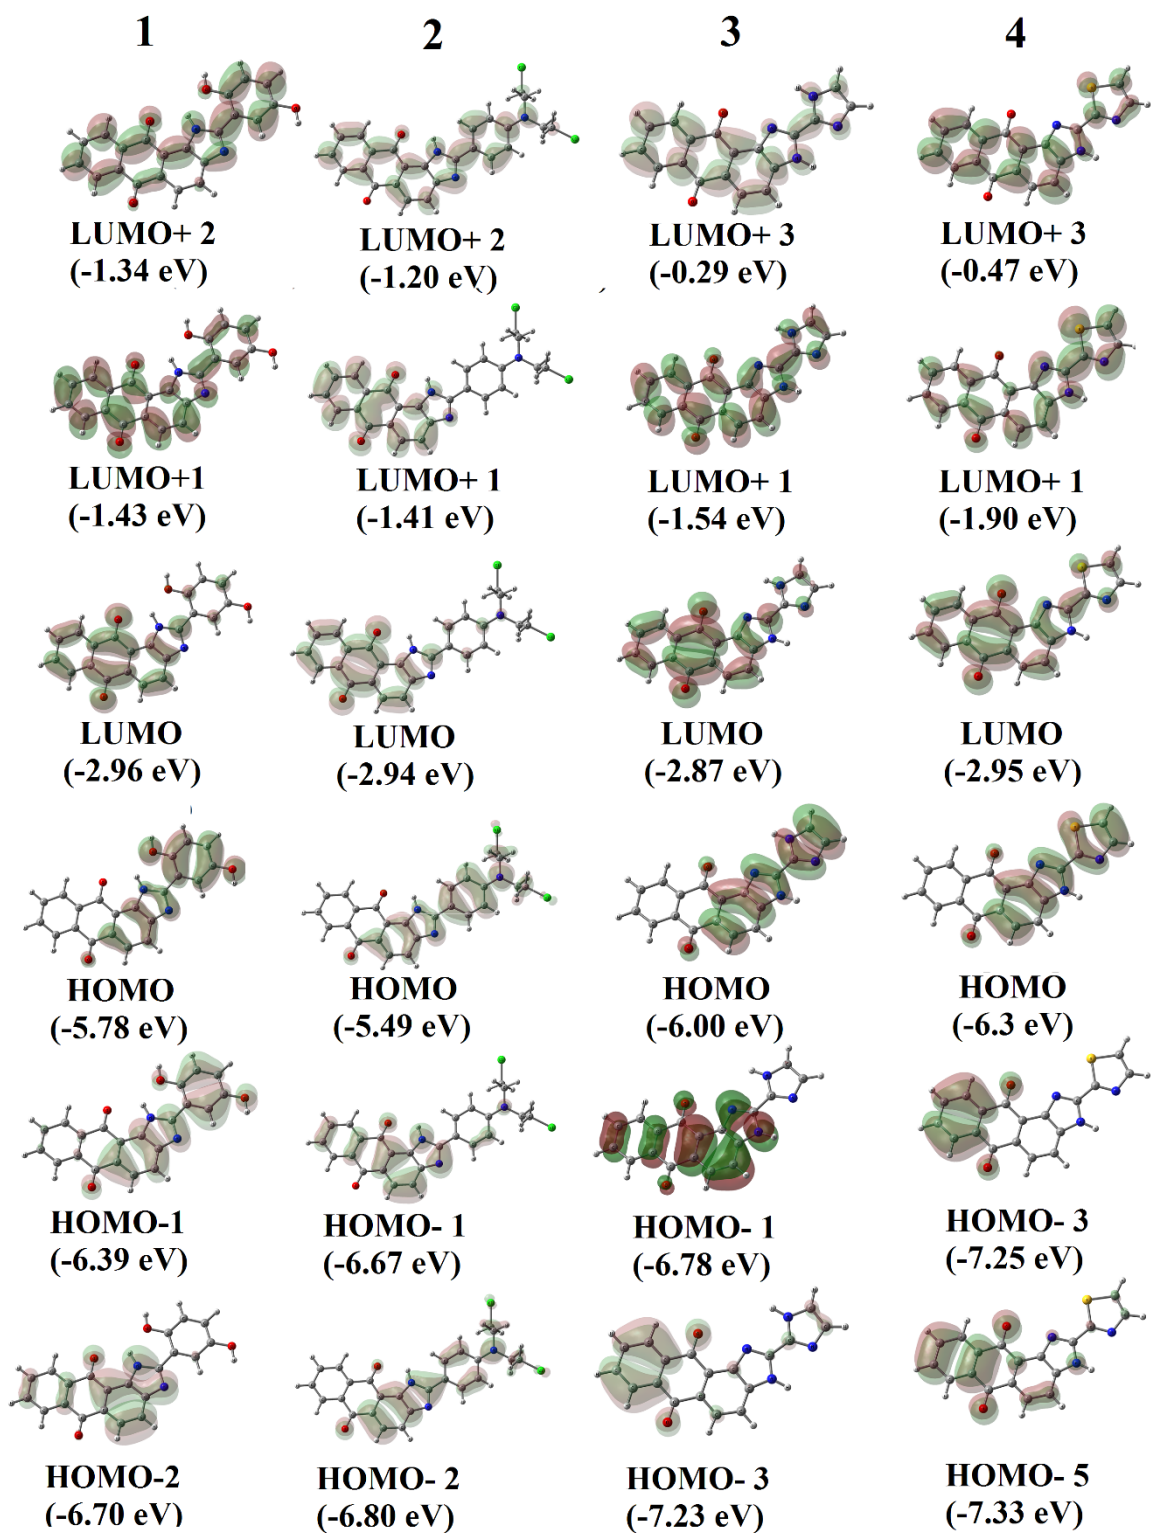

**Fig. S21.** Selected FMO illustrations and their respective energies (in eV) of ground state optimised geometry of **1-4** obtained from DFT level calculation at B3LYP/6-31G(d) in acetonitrile as solvent.

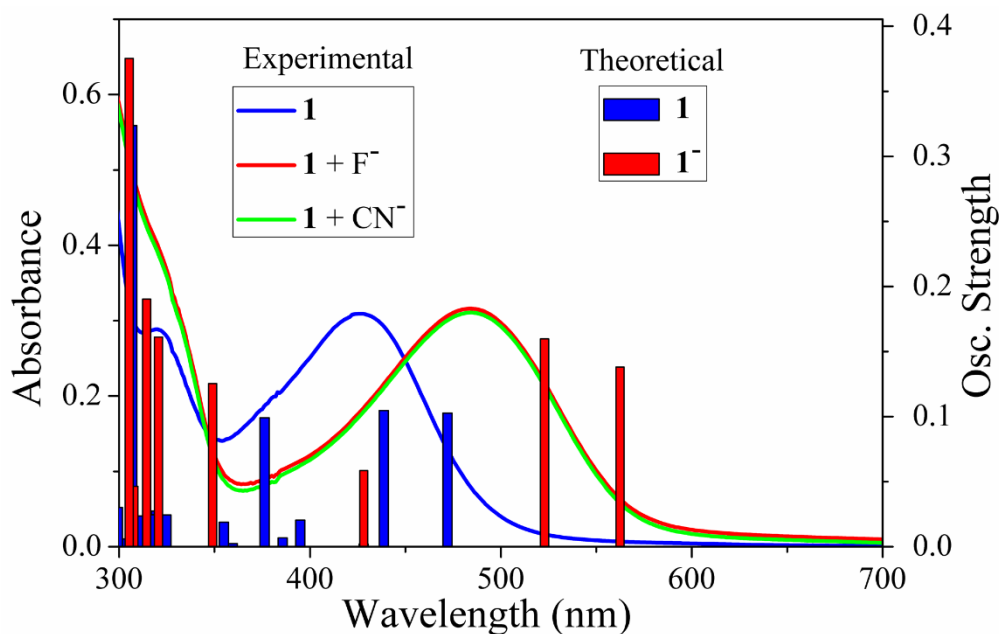

**Fig. S22** A correlative spectral overlay of electronic transition of **1** in presence of anions (experimentally in line plot) in acetonitrile; Theoretically calculated transition of **1** and its benzimidazole –NH deprotonated species (**1**<sup>-</sup>) using TDDFT at level of B3LYP/6-31G(d) in same solvent. Experimental data falls into the Gaussian distribution of calculated transitions (oscillation strength) showing good correlation.

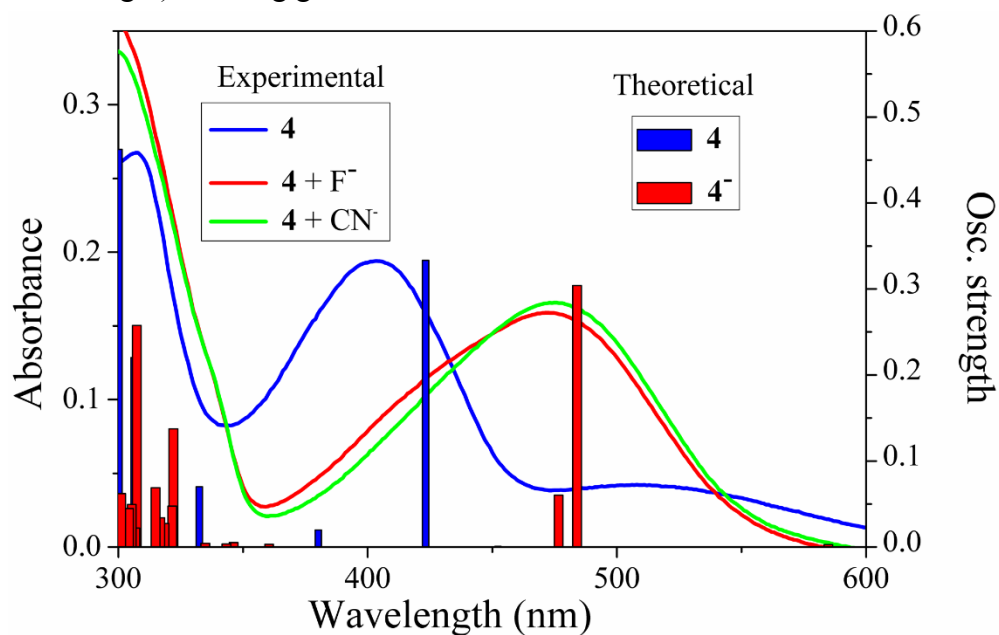

**Fig. S23** A correlative spectral overlay of electronic transition of **4** in presence of anions (experimentally in line plot) in acetonitrile; Theoretically calculated transition of **4** and its benzimidazole –NH deprotonated species (**4**<sup>-</sup>) using TDDFT at level of B3LYP/6-31G(d) in same solvent. Experimental data falls into the Gaussian distribution of calculated transitions (oscillation strength) showing good correlation.

**Table S7.** Selected electronic transition data obtained from TDDFT calculations using B3LYP/6-31G(d) and acetonitrile as solvent.

| Sensor   | $\lambda_{\text{Calc}}$<br>(nm) | Osc.<br>strength | Major MO contributions <sup>a</sup>                                                                                                                                                       |
|----------|---------------------------------|------------------|-------------------------------------------------------------------------------------------------------------------------------------------------------------------------------------------|
| <b>1</b> | 472                             | 0.1026           | HOMO(A) $\rightarrow$ L+2(A) (84%)                                                                                                                                                        |
|          | 439                             | 0.1047           | H-1(A) $\rightarrow$ LUMO(A) (11%), HOMO(B) $\rightarrow$ LUMO(B) (58%)                                                                                                                   |
|          | 376                             | 0.0991           | H-1(A) $\rightarrow$ LUMO(A) (15%), H-3(B) $\rightarrow$ LUMO(B) (23%),<br>H-2(B) $\rightarrow$ LUMO(B) (16%), HOMO(B) $\rightarrow$ LUMO(B) (19%),<br>HOMO(B) $\rightarrow$ L+1(B) (12%) |
|          | 307                             | 0.3236           | H-1(A) $\rightarrow$ LUMO(A) (28%), HOMO(B) $\rightarrow$ L+1(B) (43%)                                                                                                                    |
| <b>2</b> | 555                             | 0.4062           | HOMO $\rightarrow$ LUMO (100%)                                                                                                                                                            |
|          | 400                             | 0.0514           | H-1 $\rightarrow$ LUMO (94%)                                                                                                                                                              |
|          | 365                             | 0.0706           | H-2 $\rightarrow$ LUMO(A) (92%)                                                                                                                                                           |
|          | 333                             | 0.1278           | HOMO $\rightarrow$ L+1 (90%)                                                                                                                                                              |
| <b>3</b> | 452                             | 0.3262           | HOMO $\rightarrow$ LUMO (98%),                                                                                                                                                            |
|          | 328                             | 0.0753           | H-3 $\rightarrow$ LUMO (88%)                                                                                                                                                              |
|          | 306                             | 0.2883           | HOMO $\rightarrow$ L+1 (88%)                                                                                                                                                              |
| <b>4</b> | 423                             | 0.3333           | HOMO $\rightarrow$ LUMO (98%)                                                                                                                                                             |
|          | 332                             | 0.0701           | H-3 $\rightarrow$ LUMO (94%)                                                                                                                                                              |
|          | 306                             | 0.2203           | H-5 $\rightarrow$ LUMO (20%), HOMO $\rightarrow$ L+1 (68%)                                                                                                                                |

<sup>a</sup> Orbital contributions has been determined using GausSum 2.2 software package from Gaussian output file.

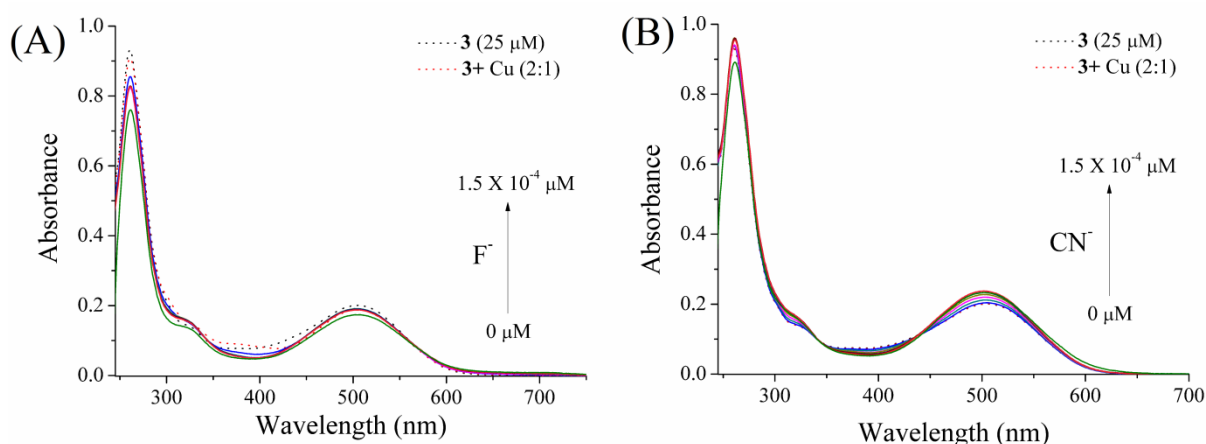

**Fig. S24** (A) UV-vis titration of **3** in acetonitrile (2% DMSO) in presence of  $\text{Cu}^{2+}$  (conc.  $12.5 \mu\text{M}$ ) with gradual addition of TBAF ( $1 \times 10^{-3} \text{ M}$ ) solution in acetonitrile. Highest concentration of  $\text{F}^-$  achieved is  $1.5 \times 10^{-4} \text{ M}$ . The spectra showed almost no change in CT band of **3** due to addition of TBAF (B) UV-vis titration of **3** in acetonitrile (2% DMSO) in presence of  $\text{Cu}^{2+}$  (conc.  $12.5 \mu\text{M}$ ) with gradual addition of TBACN ( $1 \times 10^{-3} \text{ M}$ ) solution in acetonitrile. Highest concentration of  $\text{F}^-$  achieved is  $1.5 \times 10^{-4} \text{ M}$ . The spectra showed almost no change in CT band of **1** due to addition of TBACN. The concentration of **3** in each case (A) and (B) is  $25 \mu\text{M}$ .

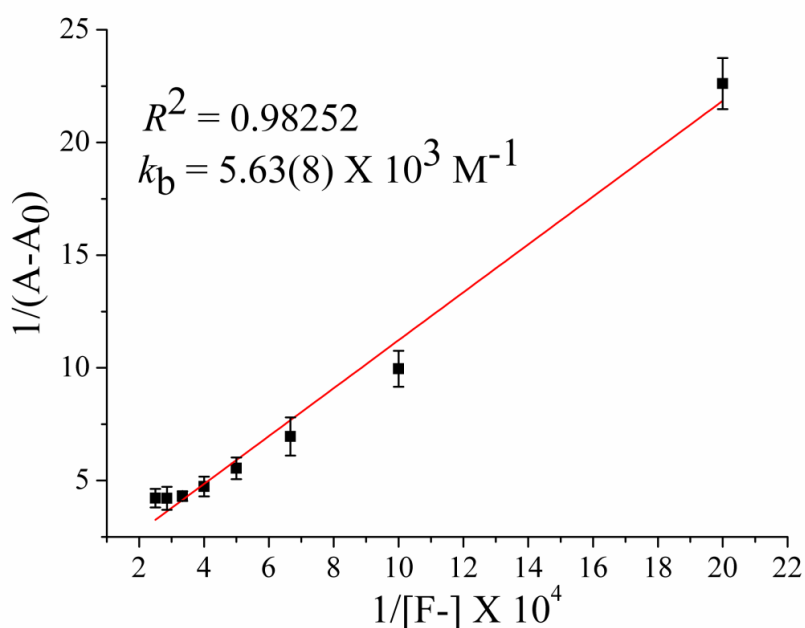

**Fig. S25** Linear plot based on Benesi-Hildebrand equation for evaluation of binding constant of **1** with fluoride (0-  $40 \mu\text{M}$ ). Concentration of **1** is  $25 \mu\text{M}$ .



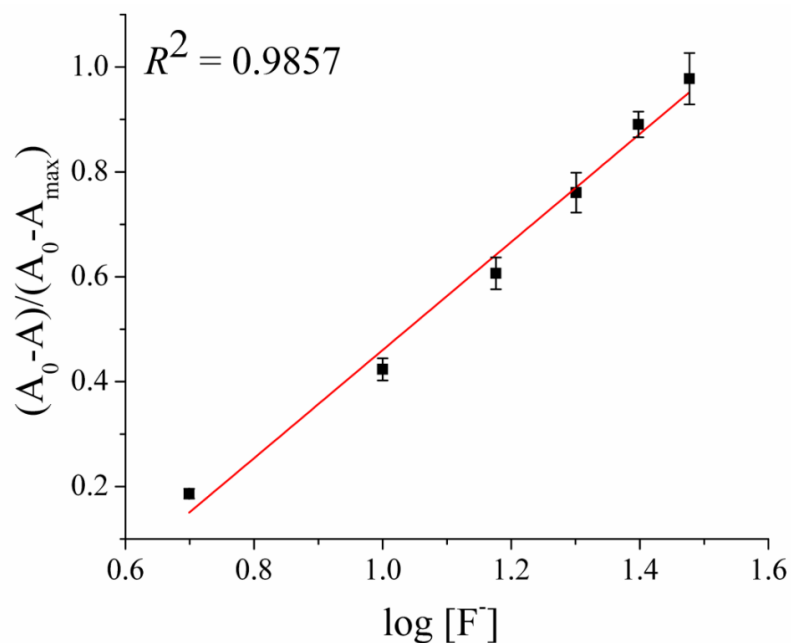

**Fig. S26** A linear curve was obtained for the plot of  $(A_0 - A)/(A_0 - A_{\max})$  vs.  $\log[F^-]$ . The intercept on the x-axis was considered as the detection limit. Thus the value obtained for the fluoride detection in case of **1** was found to be  $3.57 \times 10^{-6}$  (M). Concentration of **1** is 25  $\mu$ M

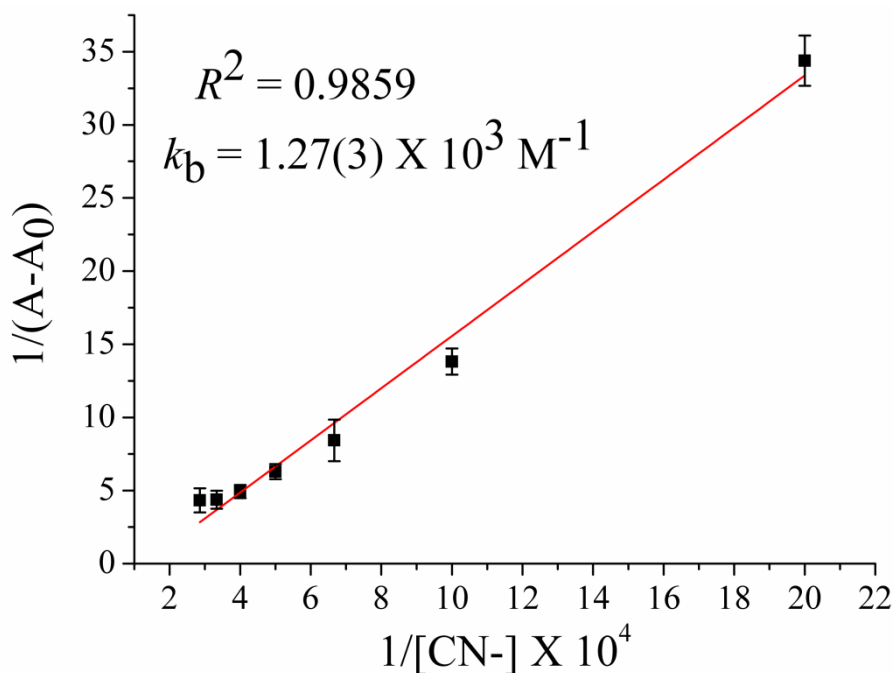

**Fig. S27** Linear plot based on Benesi-Hildebrand equation for evaluation of binding constant of **1** with cyanide (0 - 35  $\mu$ M). Concentration of **1** is 25  $\mu$ M

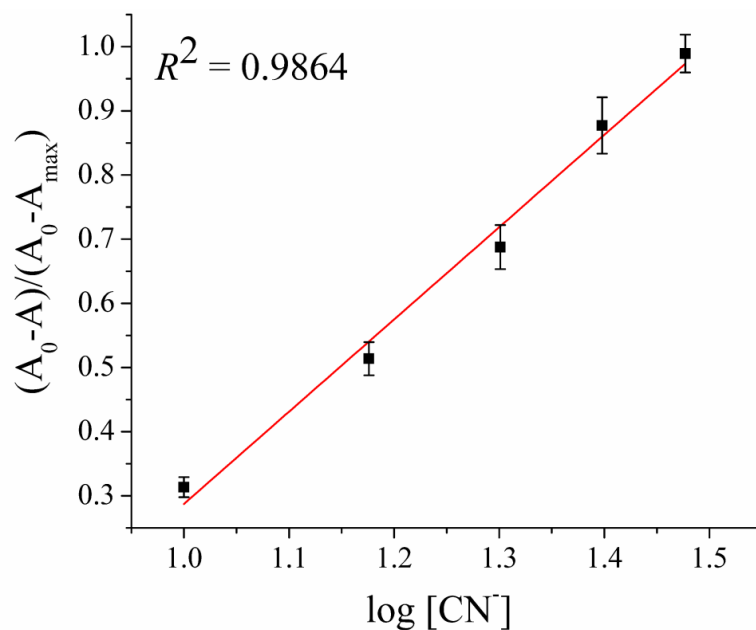

**Fig. S28** A linear curve was obtained for the plot of  $(A_0 - A)/(A_0 - A_{\max})$  vs.  $\log[\text{CN}^-]$ . The intercept on the x-axis was considered as the detection limit. Thus the value obtained for the cyanide detection in case of **1** was found to be  $6.31 \times 10^{-6}$  (M). Concentration of **1** is 25  $\mu\text{M}$

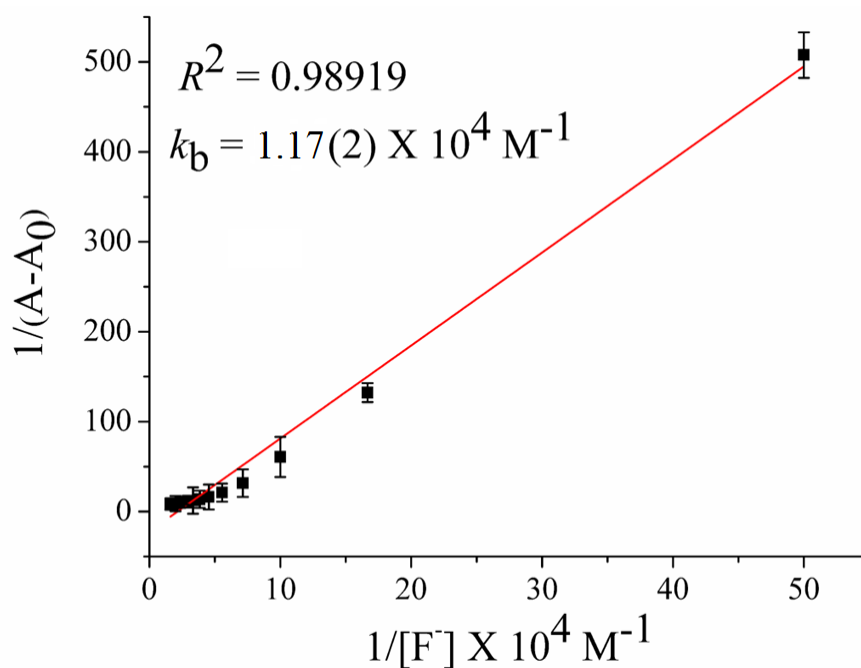

**Fig. S29** Linear plot based on Benesi-Hildebrand equation for evaluation of binding constant of **4** with fluoride (0 - 62  $\mu\text{M}$ ). Concentration of **4** is 25  $\mu\text{M}$

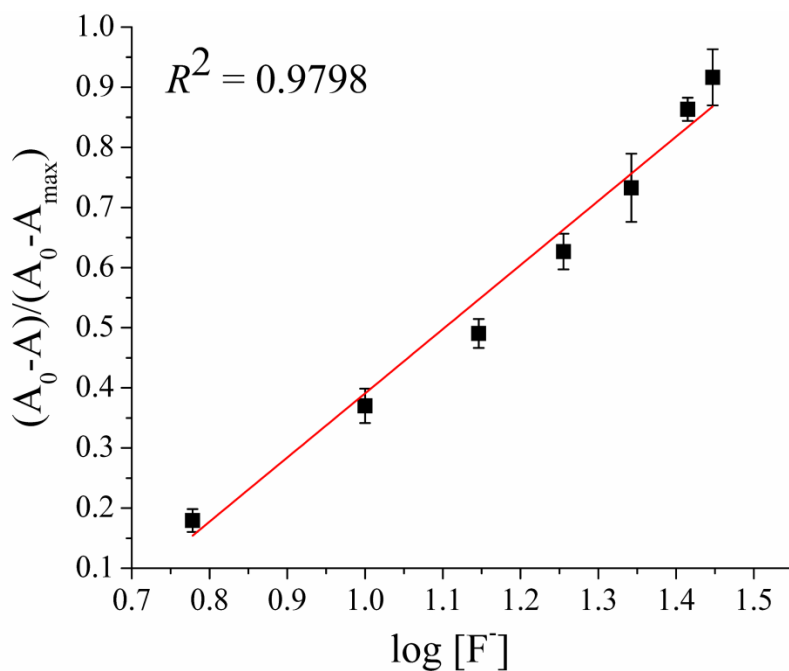

**Fig. S30** A linear curve was obtained for the plot of  $(A_0 - A) / (A_0 - A_{\max})$  vs.  $\log [F^-]$ . The intercept on the x-axis was considered as the detection limit. Thus the value obtained for the fluoride detection in case of **4** was found to be  $4.30 \times 10^{-6}$  (M). Concentration of **4** is 25  $\mu$ M.

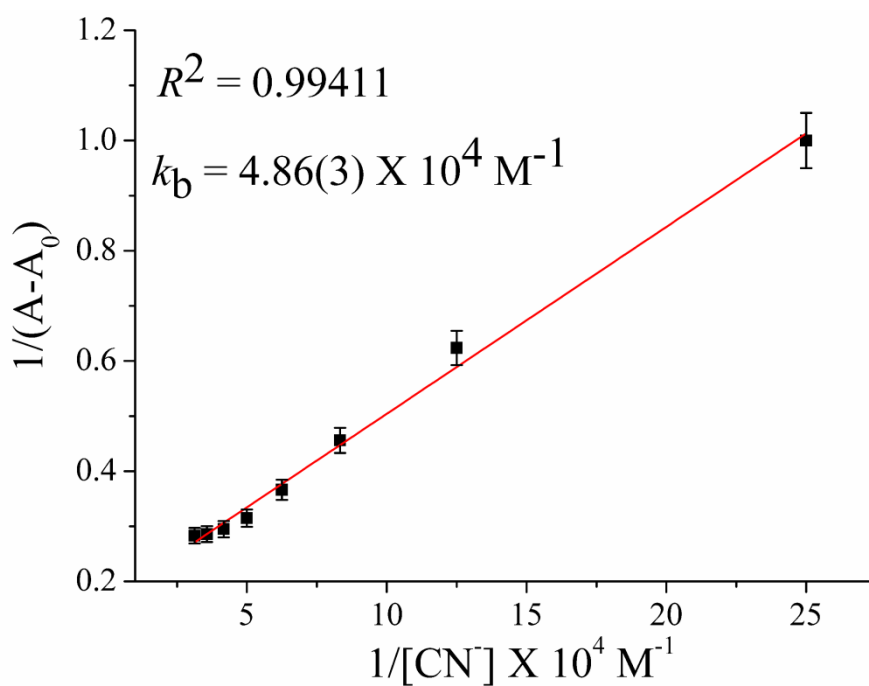

**Fig. S31** Linear plot based on Benesi-Hildebrand equation for evaluation of binding constant of **4** with cyanide (0 - 32  $\mu$ M). Concentration of **4** is 25  $\mu$ M.

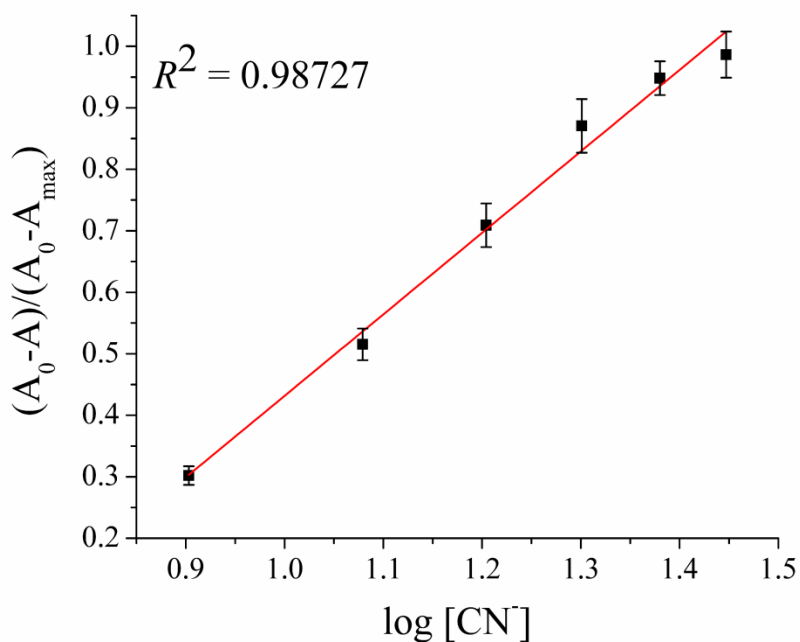

**Fig. S32** A linear curve was obtained for the plot of  $(A_0 - A)/(A_0 - A_{\max})$  vs.  $\log[\text{CN}^-]$ . The intercept on the x-axis was considered as the detection limit. Thus the value obtained for the cyanide detection in case of **4** was found to be  $4.72 \times 10^{-6}$  (M). Concentration of **4** is 25  $\mu\text{M}$

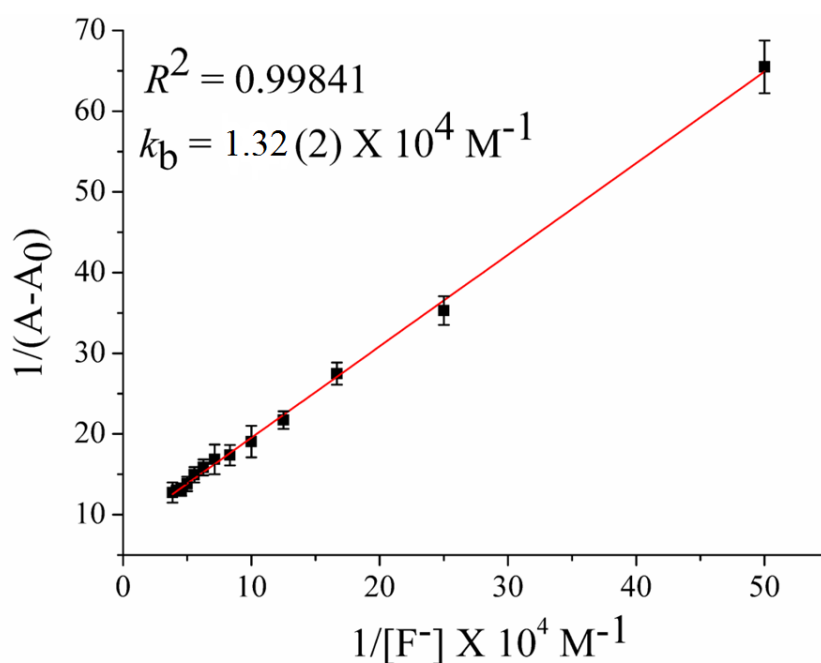

**Fig. S33** Linear plot based on Benesi-Hildebrand equation for evaluation of binding constant of **4** (25  $\mu\text{M}$ ) in presence of  $\text{Cu}^{2+}$  (12.5  $\mu\text{M}$ ) with fluoride (0 - 26  $\mu\text{M}$ ).

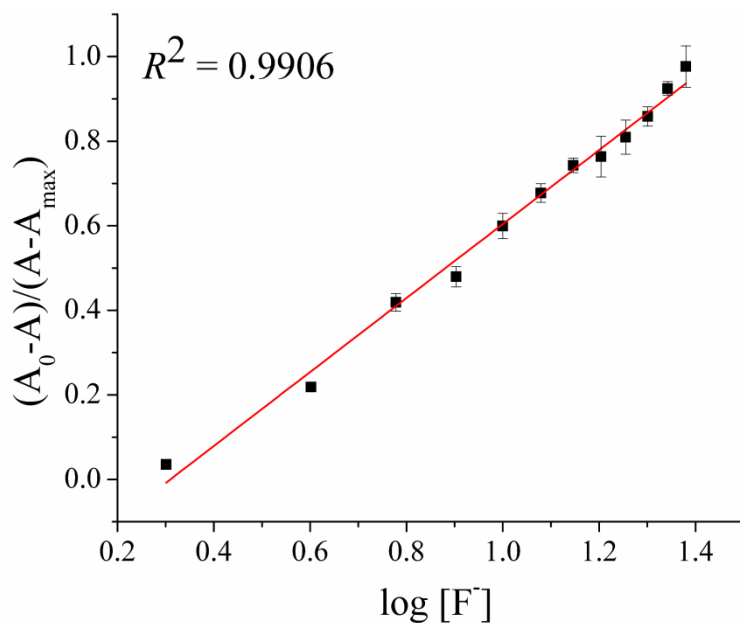

**Fig. S34** A linear curve was obtained for the plot of  $(A_0 - A)/(A_0 - A_{\max})$  vs.  $\log[F^-]$ . The intercept on the x-axis was considered as the detection limit. Thus the value obtained for the fluoride detection in case of **4** was found to be  $2.03 \times 10^{-6}$  (M). Concentration of **4** is 25  $\mu$ M.

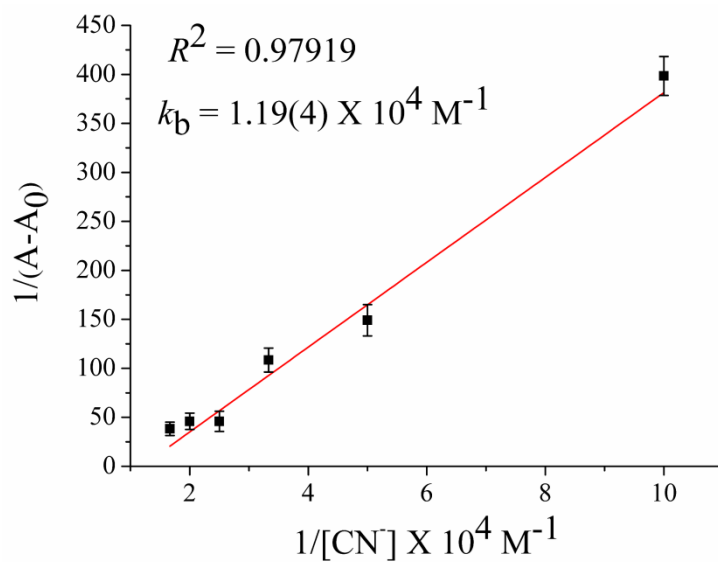

**Fig. S35** Linear plot based on Benesi-Hildebrand equation for evaluation of binding constant of **4** (25  $\mu$ M) in presence of  $\text{Cu}^{2+}$  (12.5  $\mu$ M) with cyanide (0 - 60  $\mu$ M).

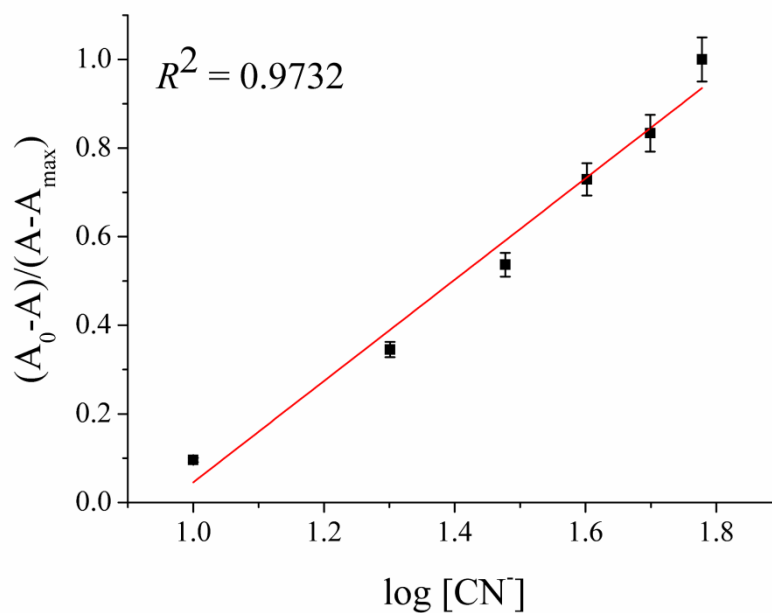

**Fig. S36** A linear curve was obtained for the plot of  $(A_0 - A)/(A_0 - A_{\max})$  vs.  $\log[\text{CN}^-]$ . The intercept on the x-axis was considered as the detection limit. Thus the value obtained for the cyanide detection in case of **4** in presence of  $\text{Cu}^{2+}$  was found to be  $9.12 \times 10^{-6}$  (M). Concentration of **4** is 25  $\mu\text{M}$ .

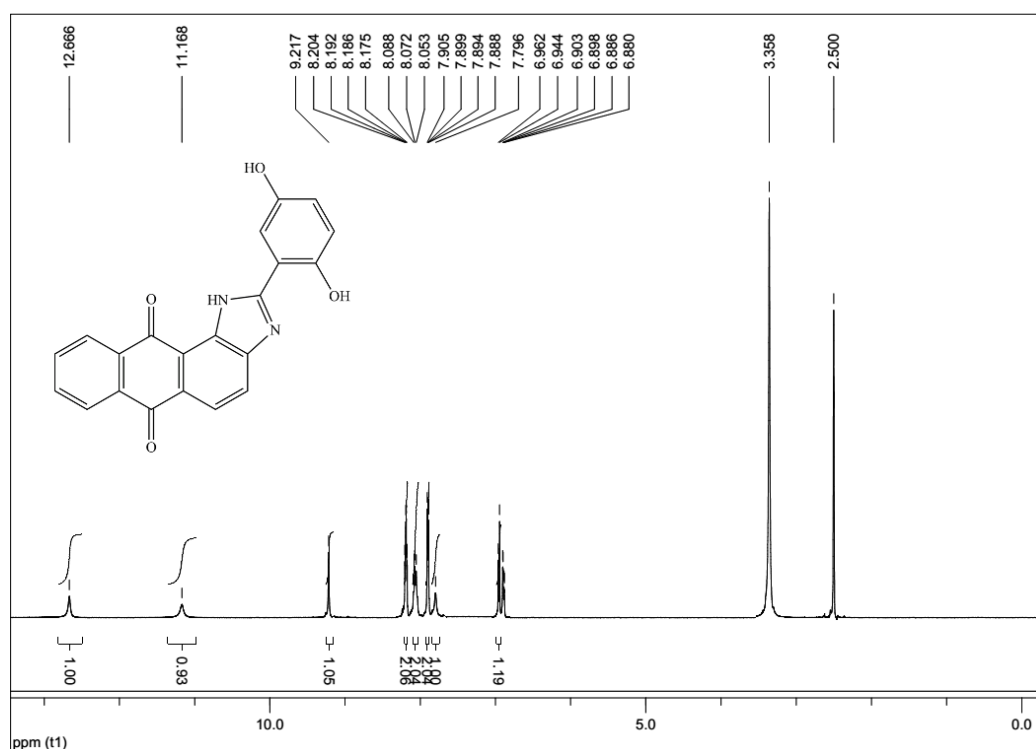

**Fig. S37**  $^1\text{H}$  NMR of **1** in  $\text{DMSO}-d_6$ .

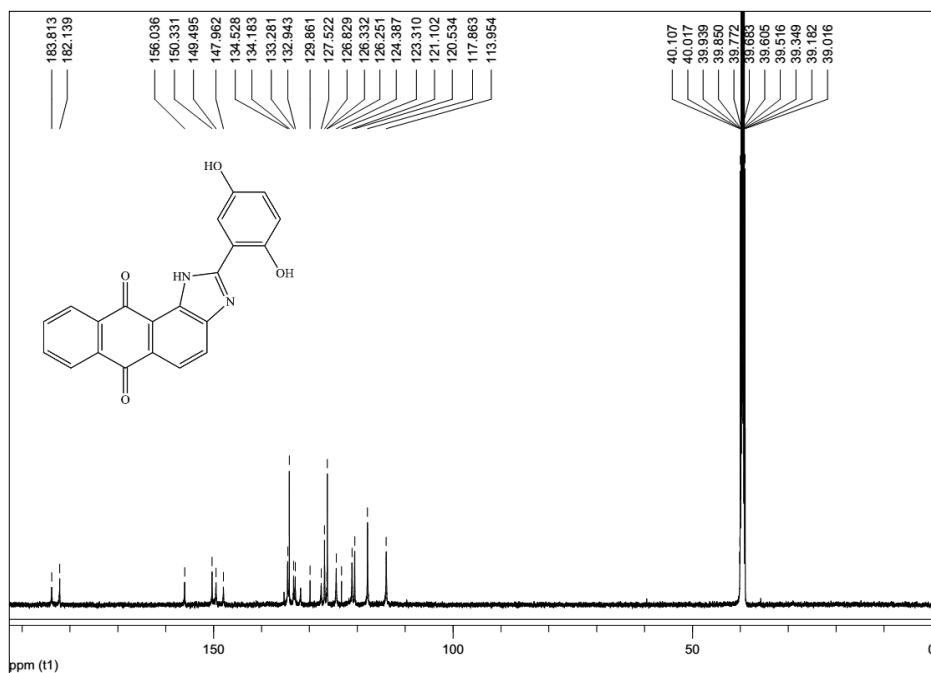

Fig. S38 <sup>13</sup>C NMR of 1 in DMSO-*d*<sub>6</sub>.

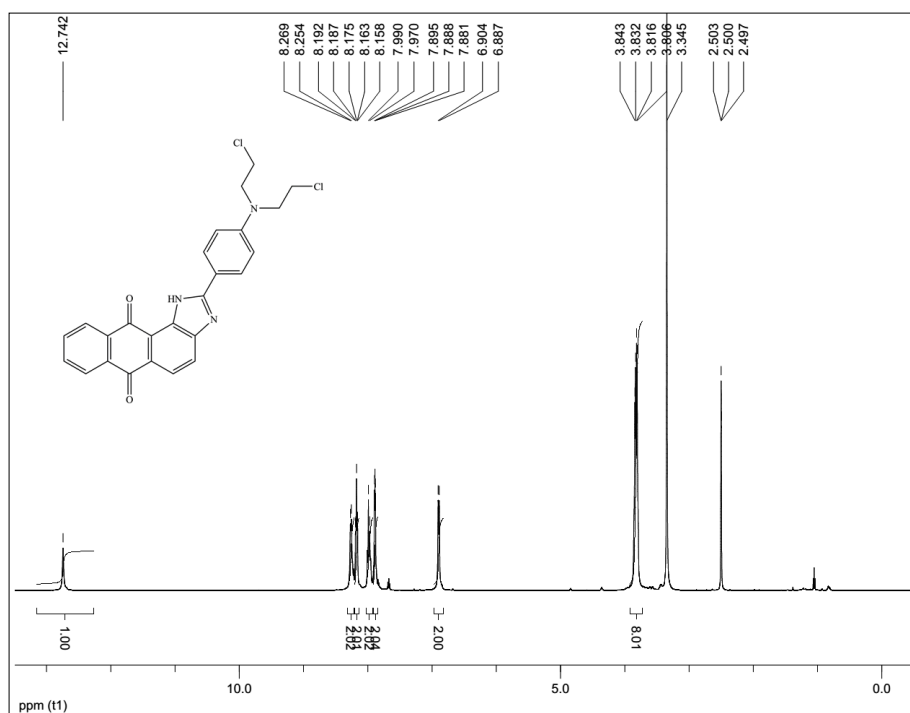

Fig. S39 <sup>1</sup>H NMR of 2 in DMSO-*d*<sub>6</sub>.

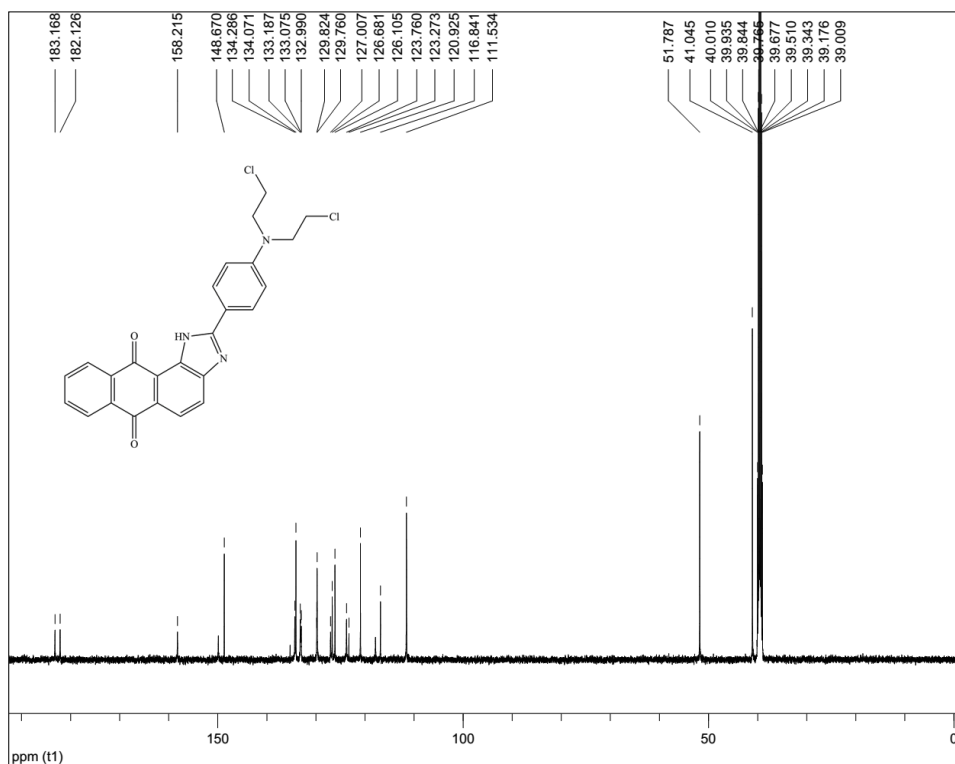

Fig. S40 <sup>13</sup>C NMR of **2** in DMSO-*d*<sub>6</sub>.

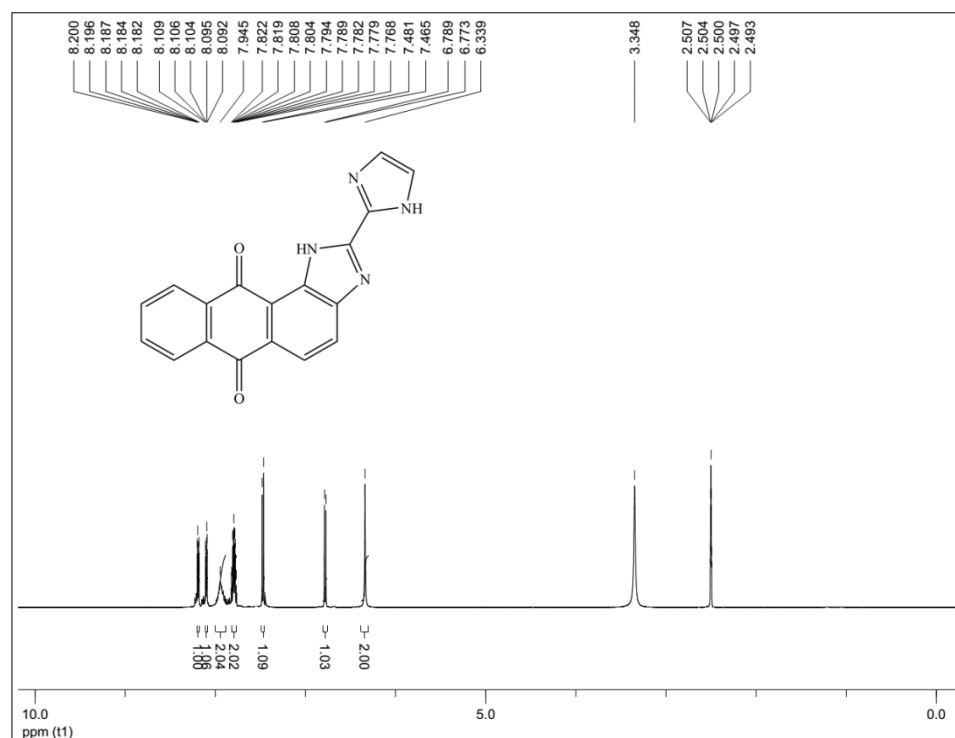

Fig. S41 <sup>1</sup>H NMR of **3** in DMSO-*d*<sub>6</sub>.



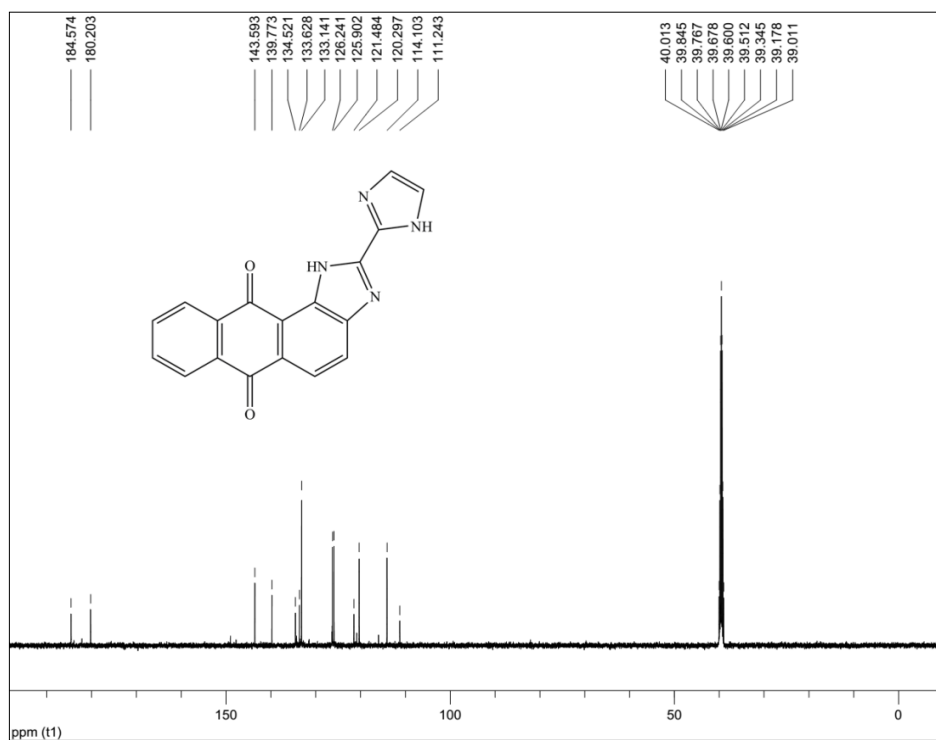

Fig. S42  $^{13}\text{C}$  NMR of 3 in  $\text{DMSO-}d_6$ .

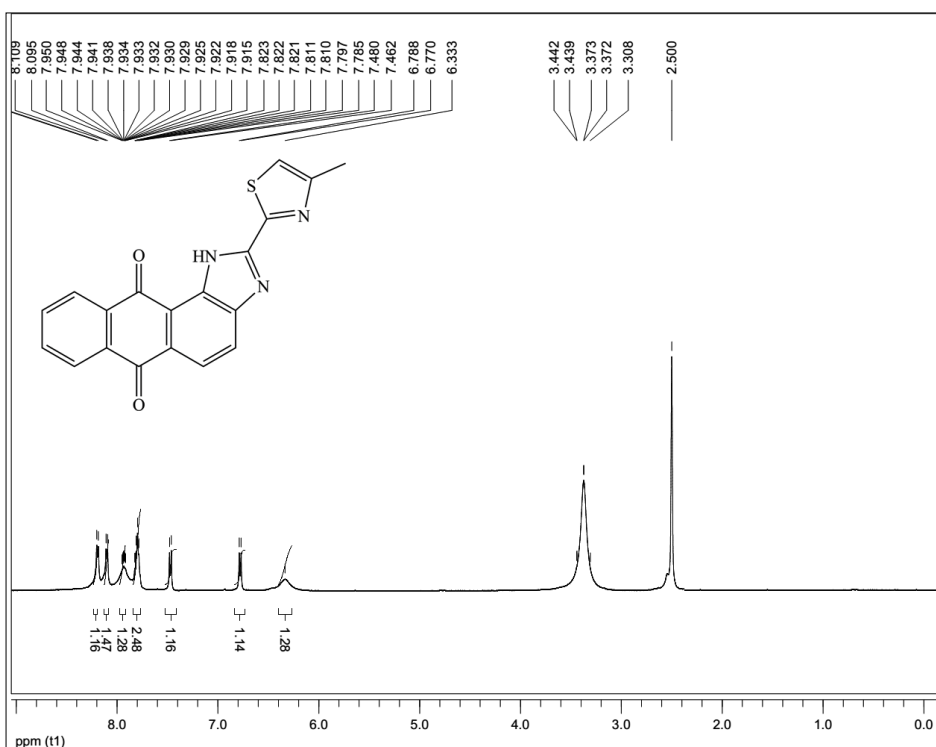

Fig. S43  $^1\text{H}$  NMR of 4 in  $\text{DMSO-}d_6$ .

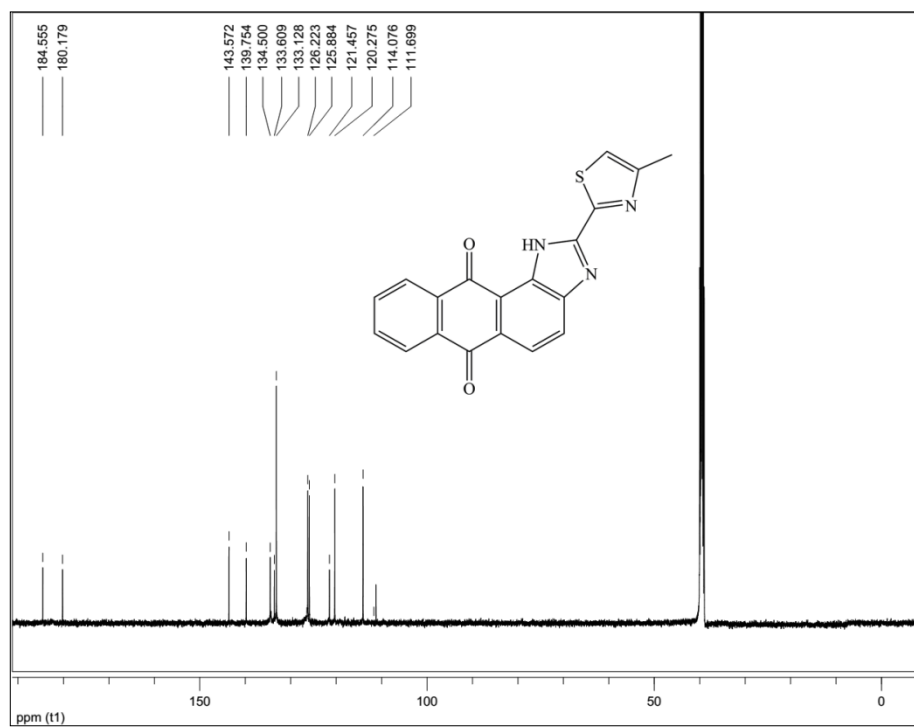

**Fig. S44**  $^{13}\text{C}$  NMR of **4** in  $\text{DMSO-}d_6$ .

## References

1. M. J. Frisch, G. W. Trucks, H. B. Schlegel, G. E. Scuseria, M. A. Robb, J. R. Cheeseman, G. Scalmani, V. Barone, B. Mennucci, G. A. Petersson, H. Nakatsuji, M. Caricato, X. Li, H. P. Hratchian, A. F. Izmaylov, J. Bloino, G. Zheng, J. L. Sonnenberg, M. Hada, M. Ehara, K. Toyota, R. Fukuda, J. Hasegawa, M. Ishida, T. Nakajima, Y. Honda, O. Kitao, H. Nakai, T. Vreven, J. A. Montgomery Jr., J. E. Peralta, F. Ogliaro, M. J. Bearpark, J. Heyd, E. N. Brothers, K. N. Kudin, V. N. Staroverov, R. Kobayashi, J. Normand, K. Raghavachari, A. P. Rendell, J. C. Burant, S. S. Iyengar, J. Tomasi, M. Cossi, N. Rega, N. J. Millam, M. Klene, J. E. Knox, J. B. Cross, V. Bakken, C. Adamo, J. Jaramillo, R. Gomperts, R. E. Stratmann, O. Yazyev, A. J. Austin, R. Cammi, C. Pomelli, J. W. Ochterski, R. L. Martin, K. Morokuma, V. G. Zakrzewski, G. A. Voth, P. Salvador, J. J. Dannenberg, S. Dapprich, A. D. Daniels, Ö. Farkas, J. B. Foresman, J. V. Ortiz, J. Cioslowski and D. J. Fox, *Journal*, 2009.
2. C. Lee, W. Yang and R. G. Parr, *Phys. Rev. B: Condens. Matter Mater. Phys.*, 1988, **37**, 785-789.
3. A. D. Becke, *J. Chem. Phys.*, 1993, **98**, 5648-5652.
4. M. A. Aguilar and F. J. Olivares del Valle, *Chemical Physics*, 1989, **129**, 439-450.
5. A. A. Rashin and K. Namboodiri, *J. Phys. Chem.*, 1987, **91**, 6003-6012.
6. N. M. O'Boyle, A. L. Tenderholt and K. M. Langner, *J. Comput. Chem.*, 2008, **29**, 839-845.
